# Supplementary material for: Obstructive airway disease and edentulism in the atherosclerosis risk in communities (ARIC) study
Source: PubMed Central journal article supplement — BMJ Open. 2012 Dec 18;2(6):e001615. doi: 10.1136/bmjopen-2012-001615 (PMC3533002; doi:10.1136/bmjopen-2012-001615), 2012-12-18
Supplement: bmjopen-2012-001615.draft_revisions.pdf [file bmjopen-2012-001615.draft_revisions.pdf]

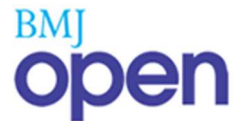

**Obstructive Lung Disease and Edentulism in the  
Atherosclerosis Risk in Communities(ARIC) Study**

|                                 |                                                                                                                                                                                                                                                                                                                                                                                                                                                                                                                                                                                                                       |
|---------------------------------|-----------------------------------------------------------------------------------------------------------------------------------------------------------------------------------------------------------------------------------------------------------------------------------------------------------------------------------------------------------------------------------------------------------------------------------------------------------------------------------------------------------------------------------------------------------------------------------------------------------------------|
| Journal:                        | <i>BMJ Open</i>                                                                                                                                                                                                                                                                                                                                                                                                                                                                                                                                                                                                       |
| Manuscript ID:                  | bmjopen-2012-001615                                                                                                                                                                                                                                                                                                                                                                                                                                                                                                                                                                                                   |
| Article Type:                   | Research                                                                                                                                                                                                                                                                                                                                                                                                                                                                                                                                                                                                              |
| Date Submitted by the Author:   | 12-Jul-2012                                                                                                                                                                                                                                                                                                                                                                                                                                                                                                                                                                                                           |
| Complete List of Authors:       | Offenbacher, Steven; Univ of NC School of Dentistry/NC Oral Health Institute/Koury Oral Health Sciences, Periodontology<br>Beck, James; Univ of NC School of Dentistry/NC Oral Health Institute/Koury Oral Health Sciences, Dental Ecology; Univ of NC School of Dentistry/NC Oral Health Institute/Koury Oral Health Sciences, Dental Ecology<br>Barros, Silvana; Univ of NC School of Dentistry/NC Oral Health Institute/Koury Oral Health Sciences, Periodontology<br>Suruki, Robert; Worldwide Epidemiology, GlaxoSmithKline R&D<br>Loewy, Zvi; Touro College of Pharmacy, Pharmaceutical and Biomedical Sciences |
| <b>Primary Subject Heading</b>: | Dentistry and oral medicine                                                                                                                                                                                                                                                                                                                                                                                                                                                                                                                                                                                           |
| Secondary Subject Heading:      | Dentistry and oral medicine                                                                                                                                                                                                                                                                                                                                                                                                                                                                                                                                                                                           |
| Keywords:                       | Pulmonary disease, Edentulism, Chronic Obstructive disease, bronchitis                                                                                                                                                                                                                                                                                                                                                                                                                                                                                                                                                |
|                                 |                                                                                                                                                                                                                                                                                                                                                                                                                                                                                                                                                                                                                       |

SCHOLARONE™  
Manuscripts

Only

1  
2  
3  
4  
5  
6  
7  
8  
9  
10  
11  
12  
13  
14  
15  
16  
17  
18  
19  
20  
21  
22  
23  
24  
25  
26  
27  
28  
29  
30  
31  
32  
33  
34  
35  
36  
37  
38  
39  
40  
41  
42  
43  
44  
45  
46  
47  
48  
49  
50  
51  
52  
53  
54  
55  
56  
57  
58  
59  
60

Guideline  
Not applicable

For peer review only

1  
2  
3 Word Count: 2763  
4

5 **OBSTRUCTIVE LUNG DISEASE AND EDENTULISM IN THE ATHEROSCLEROSIS RISK IN**  
6  
7 **COMMUNITIES (ARIC) STUDY**  
8

9  
10  
11 Running Title: COPD and Edentulism  
12

13  
14 **Keywords:** pulmonary disease, edentulism, chronic obstructive pulmonary disease, bronchitis  
15  
16

17  
18 Steven Offenbacher, DDS<sup>1</sup>, James D Beck, PhD<sup>2</sup>, Silvana P Barros, DDS<sup>1</sup>, Robert Suruki ,ScD<sup>3</sup> and Zvi  
19  
20 G Loewy, PhD<sup>4</sup>  
21  
22

23  
24  
25 <sup>1</sup>Department of Periodontology, School of Dentistry, University of North Carolina , Chapel Hill, NC  
26  
27 27599  
28

29  
30 <sup>2</sup>Department of Dental Ecology, School of Dentistry, University of North Carolina, Chapel Hill, NC  
31  
32 27599  
33

34  
35 <sup>3</sup>Worldwide Epidemiology, GlaxoSmithKline R&D, Research Triangle Park, NC 27709-3398  
36

37  
38 <sup>4</sup>Department of Pharmaceutical and Biomedical Sciences, Touro College of Pharmacy, New York, NY  
39  
40 10027 and Department of Biochemistry & Molecular Biology, New York Medical College, Valhalla, NY,  
41  
42 10595  
43

44  
45 \*Address correspondence to

46 Steve Offenbacher, DDS, PhD, MMSc

47 Department of Periodontology, UNC School of Dentistry

48 North Carolina Oral Health Institute

49 PO Box 14290

50 Durham, NC 27709

51 Phone: (919)425-3597 Fax: (919)425-3530

52  
53 Email: [steve\\_offenbacher@dentistry.unc.edu](mailto:steve_offenbacher@dentistry.unc.edu)  
54  
55  
56  
57  
58  
59  
60

## Abstract:

**Objectives:** We examined the potential association between prior COPD and edentulism, and whether the association varied by COPD severity using data from the Dental ARIC Study.

**Design:** Case-control

**Setting:** Community dwelling subjects from four US communities.

**Participants and Measurements:** Cases were identified as edentulous (without teeth) and subjects with one or more natural teeth were identified as dentate. COPD cases were defined by spirometry measurements that showed the ratio of forced expiratory volume (one second) to vital capacity to be less than 0.7. The severity of COPD cases was also scored using a modified Global Initiative for Chronic Obstructive Lung Disease classification criteria (GOLD scoring I-IV). Multiple-logistic regression was used to examine the association between COPD and edentulism, while adjusting for age, gender, center/race, ethnicity, education level, income, diabetes, hypertension, coronary heart disease and congestive heart failure, body mass index, smoking, smokeless tobacco use and alcohol consumption.

**Results:** 13,465 participants were included in this analysis (2,087 edentulous; 11,378 dentate). Approximately 28.3% of edentulous participants had prior COPD compared to 19.6% among dentate participants ( $p < 0.0001$ ). After adjustment for potential confounders, we observed a 1.3(1.08-1.62) and 2.5(1.68-3.63) fold increased risk of edentulism among GOLD II and GOLD III/IV COPD, respectively, as compared to the non-COPD/dentate referent. Given the short period of time between the measurements of COPD (Visit2) and dentate status (Visit4) relative to the natural history of both diseases, neither temporality nor insight as to the directionality of the association can be ascertained.

**Conclusion:** We found a significant association between prior COPD and edentulism, with evidence of a positive incremental effect seen with increasing GOLD classification.

## INTRODUCTION

1  
2  
3  
4  
5  
6  
7  
8  
9  
10  
11  
12  
13  
14  
15  
16  
17  
18  
19  
20  
21  
22  
23  
24  
25  
26  
27  
28  
29  
30  
31  
32  
33  
34  
35  
36  
37  
38  
39  
40  
41  
42  
43  
44  
45  
46  
47  
48  
49  
50  
51  
52  
53  
54  
55  
56  
57  
58  
59  
60

Chronic obstructive pulmonary disease (COPD) is currently the fifth leading cause of death world-wide, and is expected to rise to fourth place in 2030.<sup>1</sup> Although COPD has a heterogeneous clinical presentation primarily characterized by airflow limitation, generally associated with an abnormal inflammatory response of the lungs<sup>2</sup>, it is also often associated with a significant systemic inflammatory response<sup>3</sup> which has been correlated with adverse clinical effects<sup>3,4</sup>.

Over the past decade there has been an increased interest in the link between respiratory diseases and oral infection. Higher levels of tooth-associated microorganisms (plaque) and periodontal disease have been associated with COPD<sup>5,6,7</sup>. Recently, in a very comprehensive oral microbiology study, high levels of diverse microbes- including several implicated in COPD and denture stomatitis- were identified on previously worn dentures<sup>8</sup>. Thus both the teeth and the dentures are non-desquamating oral surfaces that allow the oral biofilm to emerge eliciting periodontal disease or denture stomatitis, respectively. This raises the question as to whether denture-associated microbes may contribute to COPD in a manner analogous to that similar to periodontal organisms. Because oral infections and denture-based sources of sepsis are both treatable and preventable, the potential association of high microbial burden of oral origin to COPD may represent modifiable risk factors that may potentially improve respiratory-related morbidity. It has been suggested by Garcia and colleagues<sup>7</sup> that the observed association between oral health and COPD may be due to aspiration of oral pathogens, or a common underlying host susceptibility trait that places individuals at risk for both conditions such as an exaggerated inflammatory response that is triggered by oral microbes.

Although numerous studies have examined the association between oral health and respiratory diseases in dentate individuals, the published literature are scant with respect to studies that have examined the association between edentulism and COPD status/severity. We undertook the current study to examine the potential association between COPD and edentulism using data from the Atherosclerosis Risk in

1  
2  
3 Communities (ARIC) Study. These data include not only dentate status and full-mouth periodontal  
4  
5 examination measurements, but also includes results from direct pulmonary function tests and  
6  
7 symptomology assessments that enabled us to classify the levels of COPD present.  
8  
9

## 14 **METHODS**

15  
16 We sought to test the hypothesis that the prevalence of edentulism was greater among individuals with a  
17  
18 reported history of lung disease, (i.e. COPD) and that the association with edentulism varied by COPD  
19  
20 severity as determined by a modified Global Initiative for Chronic Obstructive Lung disease (GOLD)  
21  
22 criteria. Our second hypothesis was that among dentate subjects there was a difference in the prevalence  
23  
24 of periodontal disease according to the severity of COPD as measured by GOLD criteria.  
25  
26

### 27 **Study Population and Study Design**

28  
29 The entire cohort from the ARIC study was 15,792 and the available dental cohort Dental Atherosclerosis  
30  
31 Risk in Communities (D-ARIC) data were used to study participants with both a periodontal examination  
32  
33 and completed spirometry data. The cohort selection process and reasons for exclusion appear in Figure 1.  
34  
35 Descriptions of the cohort and the periodontal examination procedure have been described previously <sup>9</sup>.  
36  
37 Eligible participants were all aged 45-64 at study entry (i.e., Visit 1) and had spirometry measurements at  
38  
39 Visit 2 (3 years later) and periodontal examinations at D-ARIC Visit 4 (6 years from visit 2).  
40  
41  
42  
43

### 44 **Case Definitions**

45  
46 Edentulism case definitions were defined as study participants without any natural teeth or implants.  
47  
48 Participants with one or more natural teeth (comprising 11,378 subjects) were selected as the dentate  
49  
50 subjects. The absence, presence or severity of periodontal disease among dentate subjects was determined  
51  
52 using the joint American Association of Periodontology/Center for Disease Control (AAP/CDC)  
53  
54 consensus definitions of Health, Early and Advanced disease.<sup>10</sup>  
55  
56  
57  
58  
59  
60

This investigation represents the first report that uses actual pulmonary function data to assess lung function as an exposure related to edentulism or periodontal disease. The measured exposure of pulmonary function was classified both as a dichotomous (e.g., COPD vs. no COPD) and ordinal categorical variable (e.g., no lung disease, restricted disease, COPD GOLD Stage I, Stage II, Stage III, and Stage IV), using the following criteria.

### Lung Obstruction

Dichotomous variable (COPD/no COPD)—Prior lung obstruction (or COPD) was defined based on spirometry measurements collected during Visit 2. Participants with a ratio of forced expiratory volume in one second ( $FEV_1$ ) and forced vital capacity (FVC) less than 0.7 were determined to have lung obstruction consistent with COPD.

Ordinal categorical variable (COPD GOLD Stage)—Severity of COPD was also examined in this study among COPD participants using a modification of the spirometry-based criteria for severity outlined in the GOLD guidelines.<sup>11,12</sup>

| <b>GOLD Stage</b>  | <b>Spirometry Criteria</b>                                                                            |
|--------------------|-------------------------------------------------------------------------------------------------------|
| No lung disease    | $FEV_1/FVC \geq 0.7$ and $FEV_1 \geq 80\%$ predicted                                                  |
| Restricted disease | $FEV_1/FVC \geq 0.7$ and $FVC < 80\%$ predicted                                                       |
| Stage 0            | Presence of respiratory symptoms in the absence of any lung function abnormality; and no lung disease |
| Stage I            | $FEV_1/FVC < 0.7$ and $FEV_1 \geq 80\%$ predicted                                                     |
| Stage II           | $FEV_1/FVC < 0.7$ and $50\% \leq FEV_1 < 80\%$ predicted                                              |
| Stage III          | $FEV_1/FVC < 0.7$ and $30\% \leq FEV_1 < 50\%$ predicted                                              |
| Stage IV           | $FEV_1/FVC < 0.7$ and $FEV_1 < 30\%$ predicted                                                        |

### **Variables of Interest**

1  
2  
3 Smoking data (both for cigarettes and cigars) collected during Visit 4 were used to adjust for the  
4  
5 confounding effect of smoking on the relationship between lung obstruction (COPD) and being  
6  
7 edentulous. Smoking was treated as a five-level categorical variable, as described in detail previously<sup>7</sup>.  
8  
9 Cardiovascular disease\_(CVD) comorbidities that may be associated with both history of lung obstruction  
10  
11 and being edentulous were also examined using data from Visit 4. Other potential confounders examined  
12  
13 included race and examination center, ethnicity, education level, income, frequency of dental visits,  
14  
15 diabetes, body mass index, alcohol use, and medication utilization. These data were extracted from Visit  
16  
17  
18 4.  
19

### 20 21 22 **Data Analysis**

23  
24 Multivariate logistic regression was used to examine the association between COPD and edentulous  
25  
26 status. This was followed by a logistic regression analysis of the dentate subjects comparing the COPD  
27  
28 prevalence and severity of dentate patients without periodontal disease to that of dentate patients with  
29  
30 periodontal disease. The exposure variable, which is lung obstruction, was examined as both a  
31  
32 dichotomous variable (e.g., positive prior COPD vs. no COPD) and by logistic models using nominal  
33  
34 variables (e.g., no lung disease, restricted disease, GOLD 0, Stage I, Stage II, Stage III, and Stage IV)  
35  
36 based upon spirometry data collected as part of the ARIC examination. For the no COPD or GOLD  
37  
38 reference group we included: subjects with and without chronic respiratory symptoms with no lung  
39  
40 function abnormality, and subjects with GOLD 0 and restricted disease. Multiple regression models were  
41  
42 used to control for confounding. When adjusting for potential confounding variables we included in  
43  
44 certain models variables that are known to modify either periodontal disease status or COPD, including  
45  
46 Body mass index and smokeless tobacco. We developed minimally and fully-adjusted logistical models  
47  
48 incorporating significant confounders and effect modifiers to compute odds ratios (OR) and 95%  
49  
50 confidence intervals (CI). SAS Version 9.2 (Cary, NC). We also included traditional risk factors for  
51  
52 edentulism, periodontal disease and COPD- such as age, even if not statistically significant in this cohort.  
53  
54  
55 A p-value of <0.05 was considered statistically significant for this study.  
56  
57  
58  
59  
60



## Sample Size and Power Calculations

We knew *a priori* that the ARIC cohort who had spirometry data from Visit 2 included 2,087 edentulous subjects, as determined by questionnaire data at Visit 4. We also had 11,378 dentate subjects with spirometry data at Visit 2, of which 5,155 subjects had a full-mouth periodontal exam completed. Thus, if approximately 9% of the 13,465 subjects (2,087 edentulous and 11,378 dentate) were determined to have COPD, we estimated that we had >99% power to detect a significant difference of 1% at  $p=0.05$  in the prevalence of COPD when comparing edentulous vs. dentate subjects.

## RESULTS

ARIC subject participation was based upon the inception cohort of 15,792 subjects. The Visit 4 screenings were broadly divided into 11,378 dentate and 2,087 edentulous subjects who also had spirometry data. These subjects are used for analyses in Tables 1-6 on the relationship between dentate status and COPD. Subjects were excluded ( $n=2,327$ ) from the original inception participants for incomplete data, dental implants only, and missing Visit 4 screening. Table 7 is based upon the 8,274 subjects eligible for the oral exam, of which 6967 (84.1%) were actually examined. Of those examined, the periodontal portion of the exam was not completed on 174 subjects, resulting in 6,793 subjects with full periodontal data.

The distribution of study subjects according to dentate status and GOLD classification is shown in Table 1. Among the edentulous subjects (2087), there were 591 or 28.3% with COPD (Gold Stages I-IV). With the exception of GOLD I where the prevalence of edentulism was 14.7 percent, the prevalence of edentulous individuals increased from 16.4 percent for GOLD 0 to 35.6% for GOLD III/IV. . The crude odds ratio (not shown in Table 1) for edentulism being associated with prior COPD vs no COPD was 1.62 (95% CI, 1.46-1.80). Approximately 13 percent of individuals with no chronic respiratory symptoms and

1  
2  
3 no lung function abnormality (i.e. no lung disease) were edentulous. There were 2232 subjects with a  
4  
5 prior COPD (19.6%) among 11,378 dentate subjects.  
6

7  
8 Table 2 presents the prevalence of various subject characteristics according to GOLD classification. In  
9  
10 this table, the GOLD reference group for statistical testing combines the following three categories of  
11  
12 subjects: no lung disease, GOLD 0, and subjects with chronic respiratory symptoms but no lung function  
13  
14 abnormality. The general patterns reflected in Table 2 show that compared to the reference group those  
15  
16 subjects in the GOLD III-IV category were much more likely to be edentulous, to smoke, to use  
17  
18 smokeless tobacco, to be African American or North Carolina Caucasians, male, and somewhat more  
19  
20 likely to have lower levels of income and education, be older and more likely to have chronic heart failure  
21  
22 and heart disease.  
23

24  
25  
26  
27 Table 3 presents multivariate logistic models for the relationship between edentulous /dentate status and  
28  
29 GOLD stages using the GOLD reference group described above. In an unadjusted model individuals with  
30  
31 GOLD II and GOLD III/IV scores were at significantly higher odds for edentulism that increased with  
32  
33 increasing GOLD stage severity (OR=2.06; 95% CI 1.79-2.38 and OR=3.38; 95% CI 2.61-4.39,  
34  
35 respectively). Minimally adjusted models (race/center, sex and age) showed similar significant effects for  
36  
37 GOLD II and GOLD III/IV with little attenuation. The increased risk of being edentulous for GOLD II  
38  
39 and GOLD III/IV categories remain significant, but have slightly lower odds ratios. However, the fully  
40  
41 adjusted model showed more attenuation with the odds for being edentulous being 1.3 (1.08-1.62) and 2.5  
42  
43 (1.68-3.63) times greater for GOLD II disease and the most severe category GOLD III/IV, respectively.  
44  
45  
46  
47  
48

49 Table 4 shows the association between periodontal status and GOLD classifications for the dentate  
50  
51 subjects. Because of small cell sizes in the GOLD III and IV groups, we combined them with GOLD II.  
52  
53 Using the CDC/AAP classification of periodontal disease, which is based upon clusters of clinical signs,  
54  
55 there is a significant positive association between higher GOLD stage and severe periodontal disease  
56  
57 (p<0.0001). Subjects with GOLD I or GOLD II-IV were more likely to have severe periodontitis than the  
58  
59  
60

1  
2  
3 reference group. With respect to the individual periodontal variables measured as means or extent scores,  
4  
5 individuals with a GOLD classification of I were more likely to have a greater extent of periodontal  
6  
7 pocket depths of 4mm or more, greater extent of attachment loss of 3mm. or more, a higher mean  
8  
9 attachment loss and a greater extent of plaque in their mouths than the reference group. Those with  
10  
11 GOLD scores of II-IV were significantly higher on all periodontal measures and had fewer teeth  
12  
13 compared to the reference group.  
14  
15

16  
17  
18 Logistic models for the association between GOLD status and periodontal status using the AAP/CDC  
19  
20 definitions appear in Table 5. As in Table 4, small cell size resulted in grouping the more severe GOLD  
21  
22 stages together as GOLD II/III/IV. In general, the odds ratios for severe periodontal disease increased  
23  
24 with more severe GOLD stage in the crude, minimally adjusted and fully adjusted models. There is also  
25  
26 an increase in odds as the severity of periodontal disease increases for the two GOLD categories shown  
27  
28 using the periodontally healthy group as the reference group within each GOLD category. Although  
29  
30 adjusting for relevant confounders generally decreased the odds, there was still a statistically significant  
31  
32 association between higher GOLD stage and severe periodontal disease in the fully adjusted model  
33  
34 (OR=1.41; 95% CI 1.07-1.87).  
35  
36  
37

38  
39  
40 The relationship between spirometry based GOLD classification and self-reported physician-based  
41  
42 diagnosis of bronchitis or emphysema is shown in Table 6. Participants classified as GOLD III/IV were  
43  
44 significantly more likely to have self-reported bronchitis or emphysema. There is a trend for a positive  
45  
46 association except for the GOLD zero category. Interestingly, 65.9% of subjects with GOLD III/IV  
47  
48 report no diagnosis of COPD suggesting that self-report of bronchitis or emphysema is not a strong  
49  
50 predictor of GOLD status. In fact, of all subjects reporting a positive diagnosis of bronchitis or  
51  
52 emphysema 53% demonstrated no evidence of chronic respiratory symptoms and no lung function  
53  
54 abnormality.  
55  
56  
57  
58  
59  
60

## DISCUSSION

We found a significant association between prior COPD and edentulism, with evidence of an increasing prevalence of edentulism with increasing GOLD classification. Although there was some reduction in the magnitude of effect in the adjusted models, the association between dentate status and GOLD classification remained significant even in the fully adjusted model, with a 1.3 fold increased odds of being edentulous in the GOLD II category and a 2.5 fold increased odds of being edentulous in the most severe GOLD III/IV category in the fully adjusted regression model. This represents the first report of an association between edentulism and COPD in a population with GOLD measurements.

In the subgroup of dentate subjects, there was a significant association between the GOLD II - IV group vs. the GOLD reference group and prevalent periodontal disease with a significant increase in the odds of entry level and severe periodontal disease in the crude and minimally adjusted models. In the fully adjusted model, only the association between GOLD stage II/III/IV and severe periodontal disease [OR 1.41 (1.07-1.87)] remained significant. This is the first population report to include both full-mouth periodontal examination data as well as Spirometry assessments, thereby providing direct confirmation of the association between severe periodontal disease and COPD, as well as a dose-response relationship between these conditions.

While there is no previous published information available about the association between edentulism status and COPD, there is evidence in the literature of an association between periodontal disease and COPD, consistent with the findings of the current study<sup>5,6,7</sup>. The results of this investigation were based upon standardized pulmonary function tests and suggest that studies that are based upon self-reported diagnoses can potentially result in significant misclassification error. Our data shown in Table 6 suggest that of the 12,297 subjects reporting no diagnosis, 2,390 subjects or 19.4% were classified as GOLD I-IV.

1  
2  
3 Among those 433 subjects with GOLD I-IV the positive predictive rate was only 15.3%. These findings  
4 suggest that an important strength of the current study was the classification of disease based on an  
5 objective biological measure (e.g., spirometry) rather than a self-reported measure.  
6  
7  
8  
9

10  
11 Additional strengths of the current study include the large sample size, the inclusion of African  
12 Americans providing some racial diversity of the sample, the use of a full-mouth examination protocol  
13 and the collection of information about key confounding variables, including but not limited to: tobacco  
14 use, hypertension, diabetes, and income. Furthermore, the outcomes of interest, edentulism and  
15 periodontal disease, were evaluated using a comprehensive oral examination at Visit 4.  
16  
17  
18  
19  
20  
21  
22  
23  
24

25 The current study must also be considered in light of certain limitations. First, the design of the current  
26 study does not allow us to determine the directionality or temporality of any association found. It has been  
27 reported previously that the dental ARIC sub-sample is healthier than the greater ARIC sample and that  
28 the edentulous subjects within the ARIC dataset have overall poorer health,<sup>9</sup> as compared to the ARIC  
29 dental sample. Thus, it is possible that the observed relationship between both edentulism and periodontal  
30 disease with prior COPD may be due in part to shared risk factors. There is also the potential bias due to  
31 differential loss to follow-up prior to Visit 4. The current study included only those subjects with dental  
32 history information at Visit 4. Finally, it is possible that participants with COPD may have been more  
33 likely to be lost to follow-up (compared to participants without COPD) or that participants with more  
34 severe COPD may have had a lower probability of surviving to Visit 4 than participants with mild COPD  
35 or normal lung function. There are no data in this report to mechanistically link edentulism with  
36 increased risk for COPD. Previous studies of periodontal disease associations with COPD have discussed  
37 the potential role of periodontal infection serving as a chronic repository of pathogenic oral organisms  
38 that could be aspirated into the airway to challenge the lungs<sup>6</sup>. Periodontal infections are also associated  
39 with increases in systemic markers of inflammation including biomarkers such as C-reactive protein  
40 (CRP)<sup>13</sup>. By analogy, edentulism is commonly associated with denture infections (denture mucositis)  
41  
42  
43  
44  
45  
46  
47  
48  
49  
50  
51  
52  
53  
54  
55  
56  
57  
58  
59  
60

1  
2  
3 which induce mucosal inflammation and unclean dentures can also pose as a chronic reservoir of oral  
4  
5 pathogens. However, the potential role of denture-based infection as a potential risk factor for COPD  
6  
7 remains to be elucidated.  
8  
9

## 10 11 12 13 14 **CONCLUSIONS**

15  
16  
17  
18 Edentulism was associated with prior COPD, with an incremental effect observed with increasing GOLD  
19  
20 classification. Additionally, among dentate individuals, severe periodontal disease was associated with  
21  
22 GOLD classification. This is one of the first analyses of COPD and dentate status, and expands upon the  
23  
24 available literature regarding periodontal disease and COPD. Further research is warranted to explore the  
25  
26 relationship of edentulism and periodontal disease with COPD.  
27  
28

## 29 30 31 **Conflict of Interest**

32  
33 There are no potential conflicts of interest that exist with any companies/organizations whose products or  
34  
35 services may be discussed in this article.  
36  
37

## 38 39 **Source of Funding**

40 This work was supported by a grant from GlaxoSmithKline and we declare that the sponsor had no role in  
41  
42 the study design, collection, analysis and interpretation of data; in the writing of the manuscript; and in  
43  
44 the decision to submit the manuscript for publication.

## 45 46 **Responsibility for Data**

47 This is to verify that we have full access to all the data in this study and take full responsibility for the  
48  
49 integrity of the data and accuracy of the data analysis, including and especially any adverse effects.  
50  
51  
52  
53  
54

## 55 56 **Abbreviations:**

57 AAP/CDC – American Association of Periodontology/Center for Disease Control  
58  
59  
60

1  
2  
3 ARIC – Atherosclerosis Risk in Communities  
4 CHF – Congestive Heart Failure  
5 CI – Confidence Intervals  
6 COPD – Chronic Obstructive Pulmonary Disease  
7 CVD – Cardiovascular Disease  
8 D-ARIC – Dental Atherosclerosis Risk in Communities  
9 FEV – Forced Expiratory Volume  
10 FVC – Forced Vital Capacity  
11 GOLD – Global Initiative for Chronic Obstructive Lung Disease  
12 MAL – Mean Attachment Loss  
13 NHANES – National Health and Nutrition Examination Survey  
14 OR – Odds Ratio  
15 SES – Social Economic Status  
16 WHO – World Health Organization  
17  
18  
19  
20  
21  
22  
23  
24  
25  
26  
27  
28  
29  
30  
31  
32  
33  
34  
35  
36  
37  
38  
39  
40  
41  
42  
43  
44  
45  
46  
47  
48  
49  
50  
51  
52  
53  
54  
55  
56  
57  
58  
59  
60

## REFERENCES

1. Wouters EFM. Economic analysis of the confronting COPD survey: an overview of results. *Respiratory Medicine* 2003;**97**(C): S3-S14.
2. Mathers CD, Loncar D. Projections of global mortality and burden of disease from 2002 to 2030. *PLoS Med.* 2006;**3**(11):e442.
3. Rabe KF, Hurd S, Anzueto A, Barnes PJ, Buist SA, Calverley P et al. Global strategy for the diagnosis, management, and prevention of chronic obstructive pulmonary disease: GOLD executive summary. *Am J Respir Crit Care Med.* 2007;**176**(6):532-55.
4. van Eeden, SF, Sin DD. Chronic Obstructive Pulmonary Disease: A Chronic Systemic Inflammatory Disease. *Respiration* 2008;**75**(2):224-38.
5. Scannapieco FA, Ho AW. Potential associations between chronic respiratory disease and periodontal disease: analysis of National Health and Nutrition Examination Survey III. *J Periodontol* 2001;**72**(1):50-6.
6. Scannapieco FA, Papandonatos GD, Dunford RG. Associations between oral conditions and respiratory disease in a national sample survey population. *Ann Periodontol* 1998;**3**(1):251-6.
7. Garcia RI, Nunn ME, Vokonas PS. Epidemiologic associations between periodontal disease and chronic obstructive pulmonary disease. *Ann Periodontol* 2001;**6**(1):71-7.
8. Glass RT, Conrad RS, Bullard JW, Goodson LB, Mehta N, Lech SJ et al. Evaluation of microbial flora found in previously worn prostheses from the Northeast and Southwest regions of United States. *Journal of Prosthetic Dentistry* 2010;**103**(6):384-9.
9. Elter JR, Offenbacher S, Toole JF, Beck JD. Relationship of periodontal disease and edentulism to stroke/TIA. *J Dent Res* 2003;**82**(12):998-1001.
10. Page RC, Eke PI. Case definitions for use in population-based surveillance of periodontitis. *J Periodontol* 2007;**78**(7 Suppl): 1387-99.
11. Pauwels RA, Buist AS, Calverley PMA, Jenkins CR, Hurd SS. Global Strategy for the Diagnosis, Management, and Prevention of Chronic Obstructive Pulmonary Disease. NHLBI/WHO Global Initiative for Chronic Obstructive Lung Disease (GOLD) Workshop Summary. *American Journal of Respiratory and Critical Care Medicine* 2001;**163**(5): 1256-76.
12. Mannino DM, Doherty DE, Buist SA. Global Initiative on Obstructive Lung Disease (GOLD) classification of lung disease and mortality: findings from the Atherosclerosis Risk in Communities (ARIC) study. *Respiratory Med* 2006;**100**(1):115-22.
13. Slade GD, Ghezzi EM, Heiss G, Beck JD, Riche E, Offenbacher S. Relationship between Periodontal Disease and C-Reactive Protein among Adults in the Atherosclerosis Risk in Communities Study. *Arch Intern Med.* 2003;**163**(10):1172-9.



Table 1. Dentate Status by GOLD Stage

|            | No Chronic<br>Respiratory<br>Symptoms &<br>No Lung<br>Function<br>Abnormality | Restricted<br>Disease<br>(FEV <sub>1</sub> /FVC≥0.7<br>and FVC<80%<br>predicted) | GOLD 0<br>(Chronic<br>Respiratory<br>Symptoms & No<br>Lung Function<br>Abnormality) | GOLD I       | GOLD II     | GOLD III/IV | p-value* |
|------------|-------------------------------------------------------------------------------|----------------------------------------------------------------------------------|-------------------------------------------------------------------------------------|--------------|-------------|-------------|----------|
| Edentulous | 1294 (13.3%)                                                                  | 151 (24.6%)                                                                      | 51 (16.4%)                                                                          | 208 (14.7%)  | 290 (25.2%) | 93 (35.6%)  |          |
| Dentate    | 8422 (86.7%)                                                                  | 464 (75.5%)                                                                      | 260 (83.6%)                                                                         | 1204 (85.3%) | 860 (74.8%) | 168 (64.4%) | <0.0001  |

\*Chisq

Table 2. Demographics by GOLD Stage

|                                | <b>GOLD Reference*</b> | <b>GOLD I</b> | <b>GOLD II</b> | <b>GOLD III/IV</b> | <b>p-value**</b> |
|--------------------------------|------------------------|---------------|----------------|--------------------|------------------|
| Edentulous                     | 1496 (14.1%)           | 208 (14.7%)   | 290 (25.2%)    | 93 (35.6%)         |                  |
| Dentate                        | 9146 (85.9%)           | 1204 (85.3%)  | 860 (74.8%)    | 168 (64.4%)        | <0.0001          |
| <b>Race/Center</b>             |                        |               |                |                    |                  |
| MS African Americans           | 2654 (25.1%)           | 191 (13.6%)   | 196 (17.1%)    | 73 (28.4%)         |                  |
| NC African Americans           | 285 (2.7%)             | 35 (2.5%)     | 27 (2.4%)      | 11 (4.3%)          |                  |
| NC White                       | 2211 (20.9%)           | 401 (28.5%)   | 344 (30.0%)    | 84 (32.7%)         |                  |
| Washington Co, MD              | 2680 (25.3%)           | 350 (24.9%)   | 337 (29.4%)    | 56 (21.8%)         |                  |
| Surburban Minneapolis          | 2747 (26.0%)           | 430 (30.6%)   | 243 (21.2%)    | 33 (12.8%)         | <0.0001          |
| Female                         | 6344 (59.6%)           | 684 (48.4%)   | 457 (39.7%)    | 125 (47.9%)        |                  |
| Male                           | 4298 (40.4%)           | 728 (51.6%)   | 693 (60.3%)    | 136 (52.1%)        | <0.0001          |
| Mean Age (StdDev)              | 62.4 (5.59)            | 64.2 (5.69)   | 64.9 (5.57)    | 64.2 (5.70)        | <0.0001          |
| Mean BMI (StdDev)              | 29.2 (5.68)            | 27.1 (4.81)   | 27.6 (5.34)    | 27.3 (6.16)        | <0.0001          |
| Diabetes (Yes)                 | 1573 (17.4%)           | 132 (10.8%)   | 179 (19.7%)    | 36 (20.7%)         |                  |
| No                             | 7486 (82.6%)           | 1090 (89.2%)  | 732 (80.4%)    | 138 (79.3%)        | <0.0001          |
| Hypertension (Yes)             | 3591 (39.4%)           | 388 (31.9%)   | 374 (40.7%)    | 74 (41.8%)         |                  |
| No                             | 5535 (60.7%)           | 829 (68.1%)   | 545 (59.3%)    | 103 (58.2%)        | <0.0001          |
| Income (Low)                   | 2718 (31.1%)           | 365 (31.2%)   | 321 (37.2%)    | 72 (41.6%)         |                  |
| Medium                         | 3071 (35.2%)           | 440 (37.6%)   | 316 (36.7%)    | 59 (34.1%)         |                  |
| High                           | 2945 (33.7%)           | 366 (31.3%)   | 225 (26.1%)    | 42 (24.3%)         | <0.0001          |
| Education (Basic)              | 2226 (21.0%)           | 291 (20.6%)   | 332 (28.9%)    | 93 (35.8%)         |                  |
| Intermediate                   | 4360 (41.0%)           | 564 (40.0%)   | 480 (41.8%)    | 101 (38.9%)        |                  |
| Advanced                       | 4038 (38.0%)           | 556 (39.4%)   | 336 (29.3%)    | 66 (25.4%)         | <0.0001          |
| Alcohol Use (Yes)              | 4404 (48.4%)           | 657 (53.9%)   | 463 (51.1%)    | 78 (44.3%)         |                  |
| No                             | 4695 (51.6%)           | 561 (46.1%)   | 444 (49.0%)    | 98 (55.7%)         | 0.001            |
| Smoke (Current, Heavy)         | 748 (8.6%)             | 191 (16.4%)   | 256 (29.8%)    | 33 (20.6%)         |                  |
| Current, Light                 | 245 (2.8%)             | 34 (2.9%)     | 15 (1.7%)      | 1 (0.6%)           |                  |
| Former, Heavy                  | 1304 (14.9%)           | 309 (26.5%)   | 339 (39.4%)    | 76 (47.5%)         |                  |
| Former, Light                  | 1981 (22.7%)           | 228 (19.6%)   | 100 (11.6%)    | 17 (10.6%)         |                  |
| Never                          | 4448 (51.0%)           | 403 (34.6%)   | 150 (17.4%)    | 33 (20.6%)         | <0.0001          |
| Smokeless Tobacco (Yes)        | 699 (7.7%)             | 131 (10.8%)   | 138 (15.2%)    | 34 (19.3%)         |                  |
| No                             | 8401 (92.3%)           | 1088 (89.3%)  | 769 (84.8%)    | 142 (80.7%)        | <0.0001          |
| Coronary Heart Disease (Yes)   | 718 (6.9%)             | 106 (7.6%)    | 159 (14.2%)    | 31 (13.0%)         |                  |
| No                             | 9727 (93.1%)           | 1281 (92.4%)  | 963 (85.8%)    | 208 (87.0%)        | <0.0001          |
| Congestive Heart Failure (Yes) | 191 (2.1%)             | 25 (2.1%)     | 41 (4.6%)      | 9 (5.1%)           |                  |
| No                             | 8878 (97.9%)           | 1194 (98.0%)  | 861 (95.5%)    | 166 (94.9%)        | <0.0001          |

\*GOLD Reference: No Chronic Respiratory Symptoms & No Lung Function Abnormality + GOLD Zero (Chronic Respiratory Symptoms & No Lung Function Abnormality) + Restrictive (FEV1/FVC  $\geq$  0.70 and FVC < 80% predicted)

\*\*Chisq or t-test

Table 3: Generalized Logits Models: Association between edentulism and GOLD Stages as compared to dentate subjects

|                              | <b>GOLD Reference*</b> | <b>GOLD I</b>    | <b>GOLD II</b>          | <b>GOLD III/IV</b>      |
|------------------------------|------------------------|------------------|-------------------------|-------------------------|
| Model 1 Crude                |                        |                  |                         |                         |
| Edentulous                   | Reference              | 1.06 (0.90-1.24) | <b>2.06 (1.79-2.38)</b> | <b>3.38 (2.61-4.24)</b> |
| Model 2 Minimally Adjusted** |                        |                  |                         |                         |
| Edentulous                   | Reference              | 1.12 (0.93-1.34) | <b>1.92 (1.61-2.28)</b> | <b>3.17 (2.28-4.38)</b> |
| Model 3 Fully Adjusted ****  |                        |                  |                         |                         |
| Edentulous                   | Reference              | 1.05 (0.86-1.28) | <b>1.32 (1.08-1.62)</b> | <b>2.47 (1.68-3.63)</b> |

\*GOLD Reference: No Chronic Respiratory Symptoms & No Lung Function Abnormality + GOLD Zero (Chronic Respiratory Symptoms & No Lung Function Abnormality) + Restrictive (FEV1/FVC  $\geq$  0.70 and FVC < 80% predicted)

\*\*Model 2 is minimally adjusted for race/center (5-level), male, age (years)

\*\*\*Model 3 is fully adjusted for race/center (5-level), male, age (years), diabetes, hypertension, smoking (5-levels), smokeless tobacco, alcohol, income (3-level), education (3-level), CFH and CHD

Table 4. Periodontal measures among the 5,155 dentate subjects by GOLD stages

|                    | GOLD Reference* | GOLD I                   | GOLD II/III/IV           | Overall p-value |
|--------------------|-----------------|--------------------------|--------------------------|-----------------|
| CDC/AAP Definition |                 |                          |                          |                 |
| Healthy N (SD)     | 2378 (43.0%)    | 281 (38.1%)              | 151 (28.5%)              |                 |
| Entry N (SD)       | 2271 (41.1%)    | 295 (40.0%)              | 233 (44.1%)              |                 |
| Severe N (SD)      | 878 (15.9%)     | 161 (21.9%)              | 145 (27.4%)              | <0.0001         |
| Mean (StdDev)      |                 |                          |                          |                 |
| Extent PD >=4mm    | 7.05 (11.3)     | 8.12 (12.3) <sup>a</sup> | 9.66 (14.8) <sup>d</sup> | <0.0001         |
| Mean PD            | 1.89 (0.56)     | 1.94 (0.61)              | 2.03 (0.74) <sup>d</sup> | <0.0001         |
| Extent AL >=3mm    | 21.7 (21.8)     | 27.6 (26.0) <sup>d</sup> | 34.3 (28.7) <sup>d</sup> | <0.0001         |
| Mean AL            | 1.72 (0.96)     | 1.94 (1.15) <sup>d</sup> | 2.29 (1.43) <sup>d</sup> | <0.0001         |
| Extent BOP         | 25.2 (23.4)     | 25.1 (24.3)              | 27.7 (26.4) <sup>a</sup> | 0.07            |
| Extent PQ >=1      | 42.5 (38.3)     | 39.3 (37.7) <sup>a</sup> | 49.9 (39.3) <sup>d</sup> | <0.0001         |
| Number of Teeth    | 22.0 (6.99)     | 21.5 (7.26)              | 18.8 (8.09) <sup>d</sup> | <0.0001         |

<sup>a</sup> = p<0.05, b=p<0.01, c=p<0.001, d=p<0.0001,

All superscripted p values are compared to reference group by Chi square or GLM

Table 5: Generalized Logits Models: Periodontal status (CDC/AAP Definition) by GOLD stages

|                             | GOLD I                  | GOLD II/III/IV          |
|-----------------------------|-------------------------|-------------------------|
| Model 1 Crude               |                         |                         |
| Healthy                     | Reference               | Reference               |
| Entry                       | 1.10 (0.92-1.31)        | <b>1.62 (1.31-2.00)</b> |
| Severe                      | <b>1.55 (1.26-1.91)</b> | <b>2.60 (2.05-3.31)</b> |
| Model 2 Minimally Adjusted* |                         |                         |
| Healthy                     | Reference               | Reference               |
| Entry                       | 0.99 (0.83-1.19)        | <b>1.42 (1.14-1.77)</b> |
| Severe                      | <b>1.46 (1.17-1.82)</b> | <b>2.17 (1.67-2.80)</b> |
| Model 3 Fully Adjusted **   |                         |                         |
| Healthy                     | Reference               | Reference               |
| Entry                       | 0.95 (0.79-1.14)        | 1.10 (0.87-1.39)        |
| Severe                      | 1.23 (0.97-1.55)        | <b>1.41 (1.07-1.87)</b> |

\*Model 2 is minimally adjusted for race/center (5-level), male, age (years)

\*\*Model 3 is fully adjusted for race/center (5-level), male, age (years), diabetes, hypertension, smoking (5-levels), smokeless tobacco, alcohol, income (3-level), education (3-level)

Table 6: Self reported physician diagnosis of bronchitis or emphysema according to GOLD stages .

|                   | <b>No Chronic Respiratory Symptoms &amp; No Lung Function Abnormality</b> | <b>GOLD Zero (Chronic Respiratory Symptoms &amp; No Lung Function Abnormality)</b> | <b>Restricted Disease (FEV<sub>1</sub>/FVC≥0.7 and FVC&lt;80% predicted)</b> | <b>GOLD I</b> | <b>GOLD II</b> | <b>GOLD III/IV</b> | <b>p-value<sup>a</sup></b> |
|-------------------|---------------------------------------------------------------------------|------------------------------------------------------------------------------------|------------------------------------------------------------------------------|---------------|----------------|--------------------|----------------------------|
| Self Report (Yes) | 633 (6.5%)                                                                | 65 (20.9%)                                                                         | 64 (10.4%)                                                                   | 143 (10.1%)   | 201 (17.5%)    | 89 (34.1%)         |                            |
| No                | 9083 (93.5%)                                                              | 246 (79.1%)                                                                        | 551 (89.6%)                                                                  | 1269 (89.7%)  | 949 (82.5%)    | 172 (65.9%)        | <0.0001                    |

a) Chi square

# Participant Flow Diagram

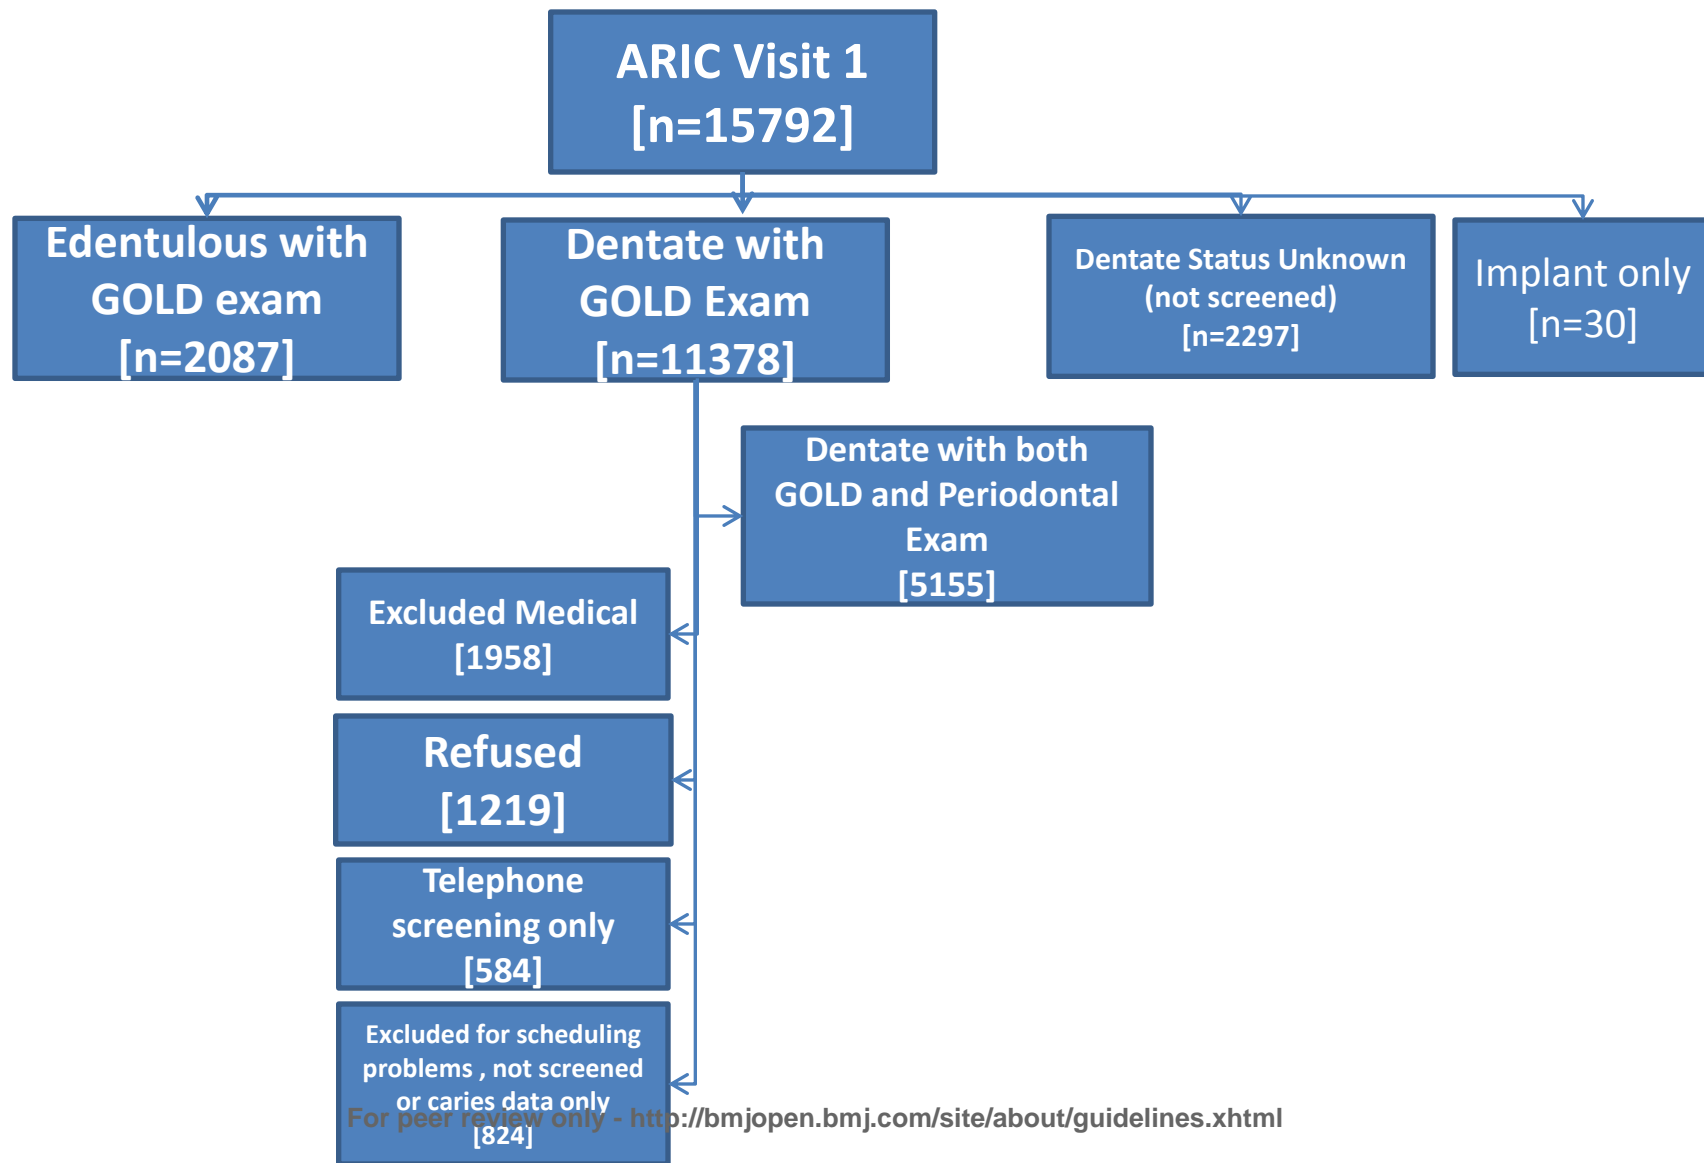



**Obstructive Lung Disease and Edentulism in the Atherosclerosis Risk in Communities(ARIC) Study**

|                                 |                                                                                                                                                                                                                                                                                                                                                                                                                                                                                                                                                                                                                       |
|---------------------------------|-----------------------------------------------------------------------------------------------------------------------------------------------------------------------------------------------------------------------------------------------------------------------------------------------------------------------------------------------------------------------------------------------------------------------------------------------------------------------------------------------------------------------------------------------------------------------------------------------------------------------|
| Journal:                        | <i>BMJ Open</i>                                                                                                                                                                                                                                                                                                                                                                                                                                                                                                                                                                                                       |
| Manuscript ID:                  | bmjopen-2012-001615.R1                                                                                                                                                                                                                                                                                                                                                                                                                                                                                                                                                                                                |
| Article Type:                   | Research                                                                                                                                                                                                                                                                                                                                                                                                                                                                                                                                                                                                              |
| Date Submitted by the Author:   | 17-Oct-2012                                                                                                                                                                                                                                                                                                                                                                                                                                                                                                                                                                                                           |
| Complete List of Authors:       | Offenbacher, Steven; Univ of NC School of Dentistry/NC Oral Health Institute/Koury Oral Health Sciences, Periodontology<br>Beck, James; Univ of NC School of Dentistry/NC Oral Health Institute/Koury Oral Health Sciences, Dental Ecology; Univ of NC School of Dentistry/NC Oral Health Institute/Koury Oral Health Sciences, Dental Ecology<br>Barros, Silvana; Univ of NC School of Dentistry/NC Oral Health Institute/Koury Oral Health Sciences, Periodontology<br>Suruki, Robert; Worldwide Epidemiology, GlaxoSmithKline R&D<br>Loewy, Zvi; Touro College of Pharmacy, Pharmaceutical and Biomedical Sciences |
| <b>Primary Subject Heading</b>: | Dentistry and oral medicine                                                                                                                                                                                                                                                                                                                                                                                                                                                                                                                                                                                           |
| Secondary Subject Heading:      | Respiratory medicine, Cardiovascular medicine                                                                                                                                                                                                                                                                                                                                                                                                                                                                                                                                                                         |
| Keywords:                       | Pulmonary disease, Edentulism, Chronic Obstructive disease, bronchitis                                                                                                                                                                                                                                                                                                                                                                                                                                                                                                                                                |
|                                 |                                                                                                                                                                                                                                                                                                                                                                                                                                                                                                                                                                                                                       |

SCHOLARONE™  
Manuscripts

only



1  
2  
3 Word Count: 2763  
4

5 **OBSTRUCTIVE AIRWAY DISEASE AND EDENTULISM IN THE ATHEROSCLEROSIS RISK**  
6  
7 **IN COMMUNITIES (ARIC) STUDY**  
8  
9

10  
11 Running Title: COPD and Edentulism  
12

13  
14 **Keywords:** pulmonary disease, edentulism, chronic obstructive pulmonary disease, bronchitis  
15  
16

17  
18 Steven Offenbacher, DDS<sup>1</sup>, James D Beck, PhD<sup>2</sup>, Silvana P Barros, DDS<sup>1</sup>, Robert Suruki ,ScD<sup>3</sup> and Zvi  
19  
20 G Loewy, PhD<sup>4</sup>  
21  
22

23  
24  
25 <sup>1</sup>Department of Periodontology, School of Dentistry, University of North Carolina , Chapel Hill, NC  
26  
27 27599  
28

29 <sup>2</sup>Department of Dental Ecology, School of Dentistry, University of North Carolina, Chapel Hill, NC  
30  
31 27599  
32

33 <sup>3</sup>Worldwide Epidemiology, GlaxoSmithKline R&D, Research Triangle Park, NC 27709-3398  
34

35 <sup>4</sup>Department of Pharmaceutical and Biomedical Sciences, Touro College of Pharmacy, New York, NY  
36  
37 10027 and Department of Biochemistry & Molecular Biology, New York Medical College, Valhalla, NY,  
38  
39 10595  
40

41  
42 \*Address correspondence to  
43

44 Steve Offenbacher, DDS, PhD, MMSc  
45

46 Department of Periodontology, UNC School of Dentistry  
47

48 North Carolina Oral Health Institute  
49

50 PO Box 14290  
51

52 Durham, NC 27709  
53

54 Phone: (919)425-3597 Fax: (919)425-3530  
55

56 Email: [steve\\_offenbacher@dentistry.unc.edu](mailto:steve_offenbacher@dentistry.unc.edu)  
57  
58  
59  
60

## Abstract:

**Objectives:** We examined the potential association between prior COPD and edentulism, and whether the association varied by COPD severity using data from the Dental ARIC Study.

**Design:** Cross-sectional **Setting:** Community dwelling subjects from four US communities.

**Participants and Measurements:** Cases were identified as edentulous (without teeth) and subjects with one or more natural teeth were identified as dentate. COPD cases were defined by spirometry measurements that showed the ratio of forced expiratory volume (one second) to vital capacity to be less than 0.7. The severity of COPD cases was also scored using a modified Global Initiative for Chronic Obstructive Lung Disease classification criteria (GOLD scoring I-IV). Multiple-logistic regression was used to examine the association between COPD and edentulism, while adjusting for age, gender, center/race, ethnicity, education level, income, diabetes, hypertension, coronary heart disease and congestive heart failure, body mass index, smoking, smokeless tobacco use and alcohol consumption.

**Results:** 13,465 participants were included in this analysis (2,087 edentulous; 11,378 dentate). Approximately 28.3% of edentulous participants had prior COPD compared to 19.6% among dentate participants ( $p < 0.0001$ ). After adjustment for potential confounders, we observed a 1.3(1.08-1.62) and 2.5(1.68-3.63) fold increased risk of edentulism among GOLD II and GOLD III/IV COPD, respectively, as compared to the non-COPD/dentate referent. Given the short period of time between the measurements of COPD (Visit2) and dentate status (Visit4) relative to the natural history of both diseases, neither temporality nor insight as to the directionality of the association can be ascertained.

**Conclusion:** We found a statistically significant association between prior COPD and edentulism, with evidence of a positive incremental effect seen with increasing GOLD classification.

## INTRODUCTION

1  
2  
3  
4  
5  
6  
7  
8  
9  
10  
11  
12  
13  
14  
15  
16  
17  
18  
19  
20  
21  
22  
23  
24  
25  
26  
27  
28  
29  
30  
31  
32  
33  
34  
35  
36  
37  
38  
39  
40  
41  
42  
43  
44  
45  
46  
47  
48  
49  
50  
51  
52  
53  
54  
55  
56  
57  
58  
59  
60

Chronic obstructive pulmonary disease (COPD) is currently the fifth leading cause of death world-wide, and is expected to rise to fourth place in 2030.<sup>1</sup> Although COPD has a heterogeneous clinical presentation primarily characterized by airflow limitation, generally associated with an abnormal inflammatory response of the lungs<sup>2</sup>, it is also often associated with a significant systemic inflammatory response<sup>3</sup> which has been correlated with adverse clinical effects<sup>3,4</sup>.

Over the past decade there has been an increased interest in the link between respiratory diseases and oral infection. Higher levels of tooth-associated microorganisms (plaque) and periodontal disease have been associated with COPD<sup>5,6,7</sup>. Recently, in a very comprehensive oral microbiology study, high levels of diverse microbes- including several implicated in COPD and denture stomatitis- were identified on previously worn dentures<sup>8</sup>. Thus both the teeth and the dentures are non-desquamating oral surfaces that allow the oral biofilm to emerge eliciting periodontal disease or denture stomatitis, respectively. This raises the question as to whether denture-associated microbes may contribute to COPD in a manner analogous to that similar to periodontal organisms. Because oral infections and denture-based sources of sepsis are both treatable and preventable, the potential association of high microbial burden of oral origin to COPD may represent modifiable risk factors that may potentially improve respiratory-related morbidity. It has been suggested by Garcia and colleagues<sup>7</sup> that the observed association between oral health and COPD may be due to aspiration of oral pathogens, or a common underlying host susceptibility trait that places individuals at risk for both conditions such as an exaggerated inflammatory response that is triggered by oral microbes.

Although numerous studies have examined the association between oral health and respiratory diseases in dentate individuals, the published literature are scant with respect to studies that have examined the association between edentulism and COPD status/severity. We undertook the current study to examine the potential association between COPD and edentulism using data from the Atherosclerosis Risk in

1  
2  
3 Communities (ARIC) Study. We hypothesized that edentulism would be associated with a diagnosis of  
4  
5 COPD and display a higher prevalence with more spirometry categories of COPD. These data include not  
6  
7 only dentate status and full-mouth periodontal examination measurements, but also includes results from  
8  
9 direct pulmonary function tests and symptomology assessments that enabled us to classify the levels of  
10  
11 COPD present.  
12

## 13 14 15 16 17 18 **METHODS** 19

20 We sought to test the hypothesis that the prevalence of edentulism was greater among individuals with a  
21  
22 reported history of lung disease, (i.e. COPD) and that the association with edentulism varied by COPD  
23  
24 severity as determined by a modified Global Initiative for Chronic Obstructive Lung disease (GOLD)  
25  
26 criteria. Our second hypothesis was that among dentate subjects there was a difference in the prevalence  
27  
28 of periodontal disease according to the severity of COPD as measured by GOLD criteria.  
29

### 30 31 **Study Population and Study Design** 32

33 The entire cohort from the ARIC study was 15,792 and the available dental cohort Dental Atherosclerosis  
34  
35 Risk in Communities (D-ARIC) data were used to study participants with both a periodontal examination  
36  
37 and completed spirometry data. The cohort selection process and reasons for exclusion appear in Figure 1.  
38  
39 Descriptions of the cohort and the periodontal examination procedure have been described previously<sup>9</sup>.  
40  
41 Eligible participants were all aged 45-64 at study entry (i.e., Visit 1) and had spirometry measurements at  
42  
43 Visit 2 (3 years later) and periodontal examinations at D-ARIC Visit 4 (6 years from visit 2).  
44  
45  
46  
47  
48

### 49 **Case Definitions** 50

51 Edentulism case definitions were defined as study participants without any natural teeth or implants.  
52  
53 Participants with one or more natural teeth (comprising 11,378 subjects) were selected as the dentate  
54  
55 subjects. The absence, presence or severity of periodontal disease among dentate subjects was determined  
56  
57  
58  
59  
60

using the joint American Association of Periodontology/Center for Disease Control (AAP/CDC) consensus definitions of Health, Early and Advanced disease.<sup>10</sup>

This investigation represents the first report that uses actual pulmonary function data to assess lung function as an exposure related to edentulism or periodontal disease. The measured exposure of pulmonary function was classified both as a dichotomous (e.g., COPD vs. no COPD) and ordinal categorical variable (e.g., no lung disease, restrictive disease, COPD GOLD Stage I, Stage II, Stage III, and Stage IV), using the following criteria.

#### Airway obstruction

Dichotomous variable (COPD/no COPD)—Prior airway obstruction (or COPD) was defined based on spirometry measurements collected during Visit 2. Participants with a ratio of forced expiratory volume in one second ( $FEV_1$ ) and forced vital capacity (FVC) less than 0.7 were determined to have airway obstruction consistent with COPD.

Ordinal categorical variable (COPD GOLD Stage)—Severity of COPD was also examined in this study among COPD participants using a modification of the spirometry-based criteria for severity outlined in the GOLD guidelines.<sup>11,12</sup>

| <b>GOLD Stage</b>   | <b>Spirometry Criteria</b>                                                                            |
|---------------------|-------------------------------------------------------------------------------------------------------|
| No lung disease     | $FEV_1/FVC \geq 0.7$ and $FEV_1 \geq 80\%$ predicted                                                  |
| Restrictive disease | $FEV_1/FVC \geq 0.7$ and $FVC < 80\%$ predicted                                                       |
| Stage 0             | Presence of respiratory symptoms in the absence of any lung function abnormality; and no lung disease |
| Stage I             | $FEV_1/FVC < 0.7$ and $FEV_1 \geq 80\%$ predicted                                                     |
| Stage II            | $FEV_1/FVC < 0.7$ and $50\% \leq FEV_1 < 80\%$ predicted                                              |
| Stage III           | $FEV_1/FVC < 0.7$ and $30\% \leq FEV_1 < 50\%$ predicted                                              |
| Stage IV            | $FEV_1/FVC < 0.7$ and $FEV_1 < 30\%$ predicted                                                        |

## Variables of Interest

Smoking data (both for cigarettes and cigars) collected during Visit 4 were used to adjust for the confounding effect of smoking on the relationship between airway obstruction (COPD) and being edentulous. Smoking was treated as a five-level categorical variable, as described in detail previously<sup>7</sup>. Cardiovascular disease\_(CVD) comorbidities that may be associated with both history of airway obstruction and being edentulous were also examined using data from Visit 4. Other potential confounders examined included race and examination center, ethnicity, education level, income, frequency of dental visits, diabetes, body mass index, alcohol use, and medication utilization. These data were extracted from Visit 4.

## Data Analysis

Multivariate logistic regression was used to examine the association between COPD and edentulous status. This was followed by a logistic regression analysis of the dentate subjects comparing the COPD prevalence and severity of dentate patients without periodontal disease to that of dentate patients with periodontal disease. The exposure variable, which is airway obstruction, was examined as both a dichotomous variable (e.g., positive prior COPD vs. no COPD) and by logistic models using nominal variables (e.g., no lung disease, restrictive disease, GOLD 0, Stage I, Stage II, Stage III, and Stage IV) based upon spirometry data collected as part of the ARIC examination. For the no COPD or GOLD reference group we included: subjects with and without chronic respiratory symptoms with no lung function abnormality, and subjects with GOLD 0 and restrictive disease. Multiple regression models were used to control for confounding. When adjusting for potential confounding variables we included in certain models variables that are known to modify either periodontal disease status or COPD, including Body mass index and smokeless tobacco. We developed minimally and fully-adjusted logistical models incorporating significant confounders and effect modifiers to compute odds ratios (OR) and 95% confidence intervals (CI). SAS Version 9.2 (Cary, NC). We also included traditional risk factors for

1  
2  
3 edentulism, periodontal disease and COPD- such as age, even if not statistically significant in this cohort.  
4  
5 A p-value of <0.05 was considered statistically significant for this study.  
6  
7  
8  
9

### 10 **Sample Size and Power Calculations**

11 We knew *a priori* that the ARIC cohort who had spirometry data from Visit 2 included 2,087 edentulous  
12 subjects, as determined by questionnaire data at Visit 4. We also had 11,378 dentate subjects with  
13 spirometry data at Visit 2, of which 5,155 subjects had a full-mouth periodontal exam completed. Thus, if  
14 approximately 9% of the 13,465 subjects (2,087 edentulous and 11,378 dentate) were determined to have  
15 COPD, we estimated that we had >99% power to detect a significant difference of 1% at p=0.05 in the  
16 prevalence of COPD when comparing edentulous vs. dentate subjects.  
17  
18  
19  
20  
21  
22  
23  
24  
25  
26

### 27 **RESULTS**

28 ARIC subject participation was based upon the inception cohort of 15,792 subjects. The Visit 4  
29 screenings were broadly divided into 11,378 dentate and 2,087 edentulous subjects who also had  
30 spirometry data. These subjects are used for analyses in Tables 1-6 on the relationship between dentate  
31 status and COPD. Subjects were excluded (n=2,327) from the original inception participants for  
32 incomplete data, dental implants only, and missing Visit 4 screening. Table 7 is based upon the 8,274  
33 subjects eligible for the oral exam, of which 6967 (84.1%) were actually examined. Of those examined,  
34 the periodontal portion of the exam was not completed on 174 subjects, resulting in 6,793 subjects with  
35 full periodontal data.  
36  
37  
38  
39  
40  
41  
42  
43  
44  
45  
46  
47  
48

49 The distribution of study subjects according to dentate status and GOLD classification is shown in Table  
50 1. Among the edentulous subjects (2087), there were 591 or 28.3% with COPD (Gold Stages I-IV). With  
51 the exception of GOLD I where the prevalence of edentulism was 14.7 percent, the prevalence of  
52 edentulous individuals increased from 16.4 percent for GOLD 0 to 35.6% for GOLD III/IV. . The crude  
53 odds ratio (not shown in Table 1) for edentulism being associated with prior COPD vs no COPD was 1.62  
54  
55  
56  
57  
58  
59  
60

1  
2  
3 (95% CI, 1.46-1.80). Approximately 13 percent of individuals with no chronic respiratory symptoms and  
4 no lung function abnormality (i.e. no lung disease) were edentulous. There were 2232 subjects with a  
5 prior COPD (19.6%) among 11,378 dentate subjects.  
6  
7

8  
9  
10 Table 2 presents the prevalence of various subject characteristics according to GOLD classification. In  
11 this table, the GOLD reference group for statistical testing combines the following three categories of  
12 subjects: no lung disease, GOLD 0, and subjects with chronic respiratory symptoms but no lung function  
13 abnormality. The general patterns reflected in Table 2 show that compared to the reference group those  
14 subjects in the GOLD III-IV category were much more likely to be edentulous, to smoke, to use  
15 smokeless tobacco, to be African American or North Carolina Caucasians, male, and somewhat more  
16 likely to have lower levels of income and education, be older and more likely to have chronic heart failure  
17 and heart disease.  
18  
19  
20  
21  
22  
23  
24  
25  
26  
27  
28

29 Table 3 presents multivariate logistic models for the relationship between edentulous /dentate status and  
30 GOLD stages using the GOLD reference group described above. In an unadjusted model individuals with  
31 GOLD II and GOLD III/IV scores were at significantly higher odds for edentulism that increased with  
32 increasing GOLD stage severity (OR=2.06; 95% CI 1.79-2.38 and OR=3.38; 95% CI 2.61-4.39,  
33 respectively). Minimally adjusted models (race/center, sex and age) showed similar significant effects for  
34 GOLD II and GOLD III/IV with little attenuation. The increased risk of being edentulous for GOLD II  
35 and GOLD III/IV categories remain significant, but have slightly lower odds ratios. However, the fully  
36 adjusted model showed more attenuation with the odds for being edentulous being 1.3 (1.08-1.62) and 2.5  
37 (1.68-3.63) times greater for GOLD II disease and the most severe category GOLD III/IV, respectively.  
38  
39  
40  
41  
42  
43  
44  
45  
46  
47  
48  
49  
50

51 Table 4 shows the association between periodontal status and GOLD classifications for the dentate  
52 subjects. Because of small cell sizes in the GOLD III and IV groups, we combined them with GOLD II.  
53 Using the CDC/AAP classification of periodontal disease, which is based upon clusters of clinical signs,  
54 there is a significant positive association between higher GOLD stage and severe periodontal disease  
55  
56  
57  
58  
59  
60



1  
2  
3 (p<0.0001). Subjects with GOLD I or GOLD II-IV were more likely to have severe periodontitis than the  
4 reference group. With respect to the individual periodontal variables measured as means or extent scores,  
5 individuals with a GOLD classification of I were more likely to have a greater extent of periodontal  
6 pocket depths of 4mm or more, greater extent of attachment loss of 3mm. or more, a higher mean  
7 attachment loss and a greater extent of plaque in their mouths than the reference group. Those with  
8 GOLD scores of II-IV were significantly higher on all periodontal measures and had fewer teeth  
9 compared to the reference group.  
10  
11  
12  
13  
14  
15  
16  
17  
18  
19

20 Logistic models for the association between GOLD status and periodontal status using the AAP/CDC  
21 definitions appear in Table 5. As in Table 4, small cell size resulted in grouping the more severe GOLD  
22 stages together as GOLD II/III/IV. In general, the odds ratios for severe periodontal disease increased  
23 with more severe GOLD stage in the crude, minimally adjusted and fully adjusted models. There is also  
24 an increase in odds as the severity of periodontal disease increases for the two GOLD categories shown  
25 using the periodontally healthy group as the reference group within each GOLD category. Although  
26 adjusting for relevant confounders generally decreased the odds, there was still a statistically significant  
27 association between higher GOLD stage and severe periodontal disease in the fully adjusted model  
28 (OR=1.41; 95% CI 1.07-1.87).  
29  
30  
31  
32  
33  
34  
35  
36  
37  
38  
39  
40  
41

42 The relationship between spirometry based GOLD classification and self-reported physician-based  
43 diagnosis of bronchitis or emphysema is shown in Table 6. Participants classified as GOLD III/IV were  
44 significantly more likely to have self-reported bronchitis or emphysema. There is a trend for a positive  
45 association except for the GOLD zero category. Interestingly, 65.9% of subjects with GOLD III/IV  
46 report no diagnosis of COPD suggesting that self-report of bronchitis or emphysema is not a strong  
47 predictor of GOLD status. In fact, of all subjects reporting a positive diagnosis of bronchitis or  
48 emphysema 53% demonstrated no evidence of chronic respiratory symptoms and no lung function  
49 abnormality.  
50  
51  
52  
53  
54  
55  
56  
57  
58  
59  
60

## DISCUSSION

We found a statistically significant association between prior COPD and edentulism, with evidence of an increasing prevalence of edentulism with increasing GOLD classification. Although there was some reduction in the magnitude of effect in the adjusted models, the association between dentate status and GOLD classification remained statistically significant even in the fully adjusted model, with a 1.3 fold increased odds of being edentulous in the GOLD II category and a 2.5 fold increased odds of being edentulous in the most severe GOLD III/IV category in the fully adjusted regression model. This represents the first report of an association between edentulism and COPD in a population with GOLD measurements.

In the subgroup of dentate subjects, there was a significant association between the GOLD II - IV group vs. the GOLD reference group and prevalent periodontal disease with a statistically significant increase in the odds of entry level and severe periodontal disease in the crude and minimally adjusted models. In the fully adjusted model, only the association between GOLD stage II/III/IV and severe periodontal disease [OR 1.41 (1.07-1.87)] remained statistically significant. This is the first population report to include both full-mouth periodontal examination data as well as Spirometry assessments, thereby providing direct confirmation of the association between severe periodontal disease and COPD, as well as a dose-response relationship between these conditions.

While there is no previous published information available about the association between edentulism status and COPD, there is evidence in the literature of an association between periodontal disease and COPD, consistent with the findings of the current study<sup>5,6,7</sup>. The results of this investigation were based upon standardized pulmonary function tests and suggest that studies that are based upon self-reported

1  
2  
3 diagnoses can potentially result in statistically significant misclassification error. Our data shown in Table  
4  
5 6 suggest that of the 12,297 subjects reporting no diagnosis, 2,390 subjects or 19.4% were classified as  
6  
7 GOLD I-IV. Among those 433 subjects with GOLD I-IV the positive predictive rate was only 15.3%.  
8  
9 These findings suggest that an important strength of the current study was the classification of disease  
10  
11 based on an objective biological measure (e.g., spirometry) rather than a self-reported measure.  
12  
13

14  
15  
16 Additional strengths of the current study include the large sample size, the inclusion of African  
17  
18 Americans providing some racial diversity of the sample, the use of a full-mouth examination protocol  
19  
20 and the collection of information about key confounding variables, including but not limited to: tobacco  
21  
22 use, hypertension, diabetes, and income. Furthermore, the outcomes of interest, edentulism and  
23  
24 periodontal disease, were evaluated using a comprehensive oral examination at Visit 4.  
25  
26

27  
28  
29 The current study must also be considered in light of certain limitations. First, the design of the current  
30  
31 study does not allow us to determine the directionality or temporality of any association found. It has been  
32  
33 reported previously that the dental ARIC sub-sample is healthier than the greater ARIC sample and that  
34  
35 the edentulous subjects within the ARIC dataset have overall poorer health,<sup>9</sup> as compared to the ARIC  
36  
37 dental sample. Thus, it is possible that the observed relationship between both edentulism and periodontal  
38  
39 disease with prior COPD may be due in part to shared risk factors. There is also the potential bias due to  
40  
41 differential loss to follow-up prior to Visit 4. The current study included only those subjects with dental  
42  
43 history information at Visit 4. Finally, it is possible that participants with COPD may have been more  
44  
45 likely to be lost to follow-up (compared to participants without COPD) or that participants with more  
46  
47 severe COPD may have had a lower probability of surviving to Visit 4 than participants with mild COPD  
48  
49 or normal lung function. There are no data in this report to mechanistically link edentulism with  
50  
51 increased risk for COPD. Previous studies of periodontal disease associations with COPD have discussed  
52  
53 the potential role of periodontal infection serving as a chronic repository of pathogenic oral organisms  
54  
55 that could be aspirated into the airway to challenge the lungs<sup>6</sup>. Periodontal infections are also associated  
56  
57  
58  
59  
60

1  
2  
3 with increases in systemic markers of inflammation including biomarkers such as C-reactive protein  
4 (CRP)<sup>13</sup>. By analogy, edentulism is commonly associated with denture infections (denture mucositis)  
5  
6 which induce mucosal inflammation and unclean dentures can also pose as a chronic reservoir of oral  
7  
8 pathogens. However, the potential role of denture-based infection as a potential risk factor for COPD  
9  
10 remains to be elucidated.  
11  
12

## 13 14 15 16 17 18 **CONCLUSIONS** 19

20  
21  
22 Edentulism was associated with prior COPD, with an incremental effect observed with increasing GOLD  
23 classification. Additionally, among dentate individuals, severe periodontal disease was associated with  
24 GOLD classification. This is one of the first analyses of COPD and dentate status, and expands upon the  
25 available literature regarding periodontal disease and COPD. Further research is warranted to explore the  
26 relationship of edentulism and periodontal disease with COPD.  
27  
28  
29  
30  
31  
32

## 33 34 35 **Conflict of Interest** 36

37  
38 There are no potential conflicts of interest that exist with any companies/organizations whose products or  
39 services may be discussed in this article.  
40  
41

## 42 43 **Source of Funding** 44

45 This work was supported by a grant from GlaxoSmithKline and we declare that the sponsor had no role in  
46 the study design, collection, analysis and interpretation of data; in the writing of the manuscript; and in  
47 the decision to submit the manuscript for publication.  
48

## 49 50 **Responsibility for Data** 51

52 This is to verify that we have full access to all the data in this study and take full responsibility for the  
53 integrity of the data and accuracy of the data analysis, including and especially any adverse effects.  
54  
55  
56  
57  
58  
59  
60

**Abbreviations:**

AAP/CDC – American Association of Periodontology/Center for Disease Control

ARIC – Atherosclerosis Risk in Communities

CHF – Congestive Heart Failure

CI – Confidence Intervals

COPD – Chronic Obstructive Pulmonary Disease

CVD – Cardiovascular Disease

D-ARIC – Dental Atherosclerosis Risk in Communities

FEV – Forced Expiratory Volume

FVC – Forced Vital Capacity

GOLD – Global Initiative for Chronic Obstructive Lung Disease

MAL – Mean Attachment Loss

NHANES – National Health and Nutrition Examination Survey

OR – Odds Ratio

SES – Social Economic Status

WHO – World Health Organization

## REFERENCES

1. Wouters EFM. Economic analysis of the confronting COPD survey: an overview of results. *Respiratory Medicine* 2003;**97**(C): S3-S14.
2. Mathers CD, Loncar D. Projections of global mortality and burden of disease from 2002 to 2030. *PLoS Med*. 2006;**3**(11):e442.
3. Rabe KF, Hurd S, Anzueto A, Barnes PJ, Buist SA, Calverley P et al. Global strategy for the diagnosis, management, and prevention of chronic obstructive pulmonary disease: GOLD executive summary. *Am J Respir Crit Care Med*. 2007;**176**(6):532-55.
4. van Eeden, SF, Sin DD. Chronic Obstructive Pulmonary Disease: A Chronic Systemic Inflammatory Disease. *Respiration* 2008;**75**(2):224-38.
5. Scannapieco FA, Ho AW. Potential associations between chronic respiratory disease and periodontal disease: analysis of National Health and Nutrition Examination Survey III. *J Periodontol* 2001;**72**(1):50-6.
6. Scannapieco FA, Papandonatos GD, Dunford RG. Associations between oral conditions and respiratory disease in a national sample survey population. *Ann Periodontol* 1998;**3**(1):251-6.
7. Garcia RI, Nunn ME, Vokonas PS. Epidemiologic associations between periodontal disease and chronic obstructive pulmonary disease. *Ann Periodontol* 2001;**6**(1):71-7.
8. Glass RT, Conrad RS, Bullard JW, Goodson LB, Mehta N, Lech SJ et al. Evaluation of microbial flora found in previously worn prostheses from the Northeast and Southwest regions of United States. *Journal of Prosthetic Dentistry* 2010;**103**(6):384-9.
9. Elter JR, Offenbacher S, Toole JF, Beck JD. Relationship of periodontal disease and edentulism to stroke/TIA. *J Dent Res* 2003;**82**(12):998-1001.
10. Page RC, Eke PI. Case definitions for use in population-based surveillance of periodontitis. *J Periodontol* 2007;**78**(7 Suppl): 1387-99.
11. Pauwels RA, Buist AS, Calverley PMA, Jenkins CR, Hurd SS. Global Strategy for the Diagnosis, Management, and Prevention of Chronic Obstructive Pulmonary Disease. NHLBI/WHO Global Initiative for Chronic Obstructive Lung Disease (GOLD) Workshop Summary. *American Journal of Respiratory and Critical Care Medicine* 2001;**163**(5): 1256-76.
12. Mannino DM, Doherty DE, Buist SA. Global Initiative on Obstructive Lung Disease (GOLD) classification of lung disease and mortality: findings from the Atherosclerosis Risk in Communities (ARIC) study. *Respiratory Med* 2006;**100**(1):115-22.
13. Slade GD, Ghezzi EM, Heiss G, Beck JD, Riche E, Offenbacher S. Relationship between Periodontal Disease and C-Reactive Protein among Adults in the Atherosclerosis Risk in Communities Study. *Arch Intern Med*. 2003;**163**(10):1172-9.

1  
2  
3  
4  
5  
6  
7  
8  
9  
10  
11  
12  
13  
14  
15  
16  
17  
18  
19  
20  
21  
22  
23  
24  
25  
26  
27  
28  
29  
30  
31  
32  
33  
34  
35  
36  
37  
38  
39  
40  
41  
42  
43  
44  
45  
46  
47  
48  
49

Table 1. Dentate Status by GOLD Stage

|            | No Chronic Respiratory Symptoms & No Lung Function Abnormality | Restrictive Disease (FEV <sub>1</sub> /FVC≥0.7 and FVC<80% predicted) | GOLD 0 (Chronic Respiratory Symptoms & No Lung Function Abnormality) | GOLD I       | GOLD II     | GOLD III/IV | p-value* |
|------------|----------------------------------------------------------------|-----------------------------------------------------------------------|----------------------------------------------------------------------|--------------|-------------|-------------|----------|
| Edentulous | 1294 (13.3%)                                                   | 151 (24.6%)                                                           | 51 (16.4%)                                                           | 208 (14.7%)  | 290 (25.2%) | 93 (35.6%)  |          |
| Dentate    | 8422 (86.7%)                                                   | 464 (75.5%)                                                           | 260 (83.6%)                                                          | 1204 (85.3%) | 860 (74.8%) | 168 (64.4%) | <0.0001  |

\*Chisq

For peer review only

Table 2. Demographics by GOLD Stage

|                                | <b>GOLD Reference*</b> | <b>GOLD I</b> | <b>GOLD II</b> | <b>GOLD III/IV</b> | <b>p-value**</b> |
|--------------------------------|------------------------|---------------|----------------|--------------------|------------------|
| Edentulous                     | 1496 (14.1%)           | 208 (14.7%)   | 290 (25.2%)    | 93 (35.6%)         |                  |
| Dentate                        | 9146 (85.9%)           | 1204 (85.3%)  | 860 (74.8%)    | 168 (64.4%)        | <0.0001          |
| Race/Center                    |                        |               |                |                    |                  |
| MS African Americans           | 2654 (25.1%)           | 191 (13.6%)   | 196 (17.1%)    | 73 (28.4%)         |                  |
| NC African Americans           | 285 (2.7%)             | 35 (2.5%)     | 27 (2.4%)      | 11 (4.3%)          |                  |
| NC White                       | 2211 (20.9%)           | 401 (28.5%)   | 344 (30.0%)    | 84 (32.7%)         |                  |
| Washington Co, MD              | 2680 (25.3%)           | 350 (24.9%)   | 337 (29.4%)    | 56 (21.8%)         |                  |
| Suburban Minneapolis           | 2747 (26.0%)           | 430 (30.6%)   | 243 (21.2%)    | 33 (12.8%)         | <0.0001          |
| Female                         | 6344 (59.6%)           | 684 (48.4%)   | 457 (39.7%)    | 125 (47.9%)        |                  |
| Male                           | 4298 (40.4%)           | 728 (51.6%)   | 693 (60.3%)    | 136 (52.1%)        | <0.0001          |
| Mean Age (StdDev)              | 62.4 (5.59)            | 64.2 (5.69)   | 64.9 (5.57)    | 64.2 (5.70)        | <0.0001          |
| Mean BMI (StdDev)              | 29.2 (5.68)            | 27.1 (4.81)   | 27.6 (5.34)    | 27.3 (6.16)        | <0.0001          |
| Diabetes (Yes)                 | 1573 (17.4%)           | 132 (10.8%)   | 179 (19.7%)    | 36 (20.7%)         |                  |
| No                             | 7486 (82.6%)           | 1090 (89.2%)  | 732 (80.4%)    | 138 (79.3%)        | <0.0001          |
| Hypertension (Yes)             | 3591 (39.4%)           | 388 (31.9%)   | 374 (40.7%)    | 74 (41.8%)         |                  |
| No                             | 5535 (60.7%)           | 829 (68.1%)   | 545 (59.3%)    | 103 (58.2%)        | <0.0001          |
| Income (Low)                   | 2718 (31.1%)           | 365 (31.2%)   | 321 (37.2%)    | 72 (41.6%)         |                  |
| Medium                         | 3071 (35.2%)           | 440 (37.6%)   | 316 (36.7%)    | 59 (34.1%)         |                  |
| High                           | 2945 (33.7%)           | 366 (31.3%)   | 225 (26.1%)    | 42 (24.3%)         | <0.0001          |
| Education (Basic)              | 2226 (21.0%)           | 291 (20.6%)   | 332 (28.9%)    | 93 (35.8%)         |                  |
| Intermediate                   | 4360 (41.0%)           | 564 (40.0%)   | 480 (41.8%)    | 101 (38.9%)        |                  |
| Advanced                       | 4038 (38.0%)           | 556 (39.4%)   | 336 (29.3%)    | 66 (25.4%)         | <0.0001          |
| Alcohol Use (Yes)              | 4404 (48.4%)           | 657 (53.9%)   | 463 (51.1%)    | 78 (44.3%)         |                  |
| No                             | 4695 (51.6%)           | 561 (46.1%)   | 444 (49.0%)    | 98 (55.7%)         | 0.001            |
| Smoke (Current, Heavy)         | 748 (8.6%)             | 191 (16.4%)   | 256 (29.8%)    | 33 (20.6%)         |                  |
| Current, Light                 | 245 (2.8%)             | 34 (2.9%)     | 15 (1.7%)      | 1 (0.6%)           |                  |
| Former, Heavy                  | 1304 (14.9%)           | 309 (26.5%)   | 339 (39.4%)    | 76 (47.5%)         |                  |
| Former, Light                  | 1981 (22.7%)           | 228 (19.6%)   | 100 (11.6%)    | 17 (10.6%)         |                  |
| Never                          | 4448 (51.0%)           | 403 (34.6%)   | 150 (17.4%)    | 33 (20.6%)         | <0.0001          |
| Smokeless Tobacco (Yes)        | 699 (7.7%)             | 131 (10.8%)   | 138 (15.2%)    | 34 (19.3%)         |                  |
| No                             | 8401 (92.3%)           | 1088 (89.3%)  | 769 (84.8%)    | 142 (80.7%)        | <0.0001          |
| Coronary Heart Disease (Yes)   | 718 (6.9%)             | 106 (7.6%)    | 159 (14.2%)    | 31 (13.0%)         |                  |
| No                             | 9727 (93.1%)           | 1281 (92.4%)  | 963 (85.8%)    | 208 (87.0%)        | <0.0001          |
| Congestive Heart Failure (Yes) | 191 (2.1%)             | 25 (2.1%)     | 41 (4.6%)      | 9 (5.1%)           |                  |
| No                             | 8878 (97.9%)           | 1194 (98.0%)  | 861 (95.5%)    | 166 (94.9%)        | <0.0001          |

\*GOLD Reference: No Chronic Respiratory Symptoms & No Lung Function Abnormality + GOLD Zero (Chronic Respiratory Symptoms & No Lung Function Abnormality) + Restrictive (FEV1/FVC  $\geq$  0.70 and FVC < 80% predicted)

\*\*Chisq or t-test



Table 3: Generalized Logits Models: Association between edentulism and GOLD Stages as compared to dentate subjects

|                                     | <b>GOLD Reference*</b> | <b>GOLD I</b>    | <b>GOLD II</b>          | <b>GOLD III/IV</b>      |
|-------------------------------------|------------------------|------------------|-------------------------|-------------------------|
| <b>Model 1 Crude</b>                |                        |                  |                         |                         |
| Edentulous                          | Reference              | 1.06 (0.90-1.24) | <b>2.06 (1.79-2.38)</b> | <b>3.38 (2.61-4.39)</b> |
| <b>Model 2 Minimally Adjusted**</b> |                        |                  |                         |                         |
| Edentulous                          | Reference              | 1.12 (0.93-1.34) | <b>1.92 (1.61-2.28)</b> | <b>3.17 (2.28-4.41)</b> |
| <b>Model 3 Fully Adjusted ****</b>  |                        |                  |                         |                         |
| Edentulous                          | Reference              | 1.05 (0.86-1.28) | <b>1.32 (1.08-1.62)</b> | <b>2.47 (1.68-3.63)</b> |

\*GOLD Reference: No Chronic Respiratory Symptoms & No Lung Function Abnormality + GOLD Zero (Chronic Respiratory Symptoms & No Lung Function Abnormality) + Restrictive (FEV1/FVC  $\geq$  0.70 and FVC < 80% predicted)

\*\*Model 2 is minimally adjusted for race/center (5-level), male, age (years)

\*\*\*Model 3 is fully adjusted for race/center (5-level), male, age (years), diabetes, hypertension, smoking (5-levels), smokeless tobacco, alcohol, income (3-level), education (3-level), CFH and CHD

Table 4. Periodontal measures among the 5,155 dentate subjects by GOLD stages

|                           | <b>GOLD Reference*</b> | <b>GOLD I</b>            | <b>GOLD II/III/IV</b>    | <b>Overall p-value</b> |
|---------------------------|------------------------|--------------------------|--------------------------|------------------------|
| <b>CDC/AAP Definition</b> |                        |                          |                          |                        |
| Healthy N (SD)            | 2378 (43.0%)           | 281 (38.1%)              | 151 (28.5%)              |                        |
| Entry N (SD)              | 2271 (41.1%)           | 295 (40.0%)              | 233 (44.1%)              |                        |
| Severe N (SD)             | 878 (15.9%)            | 161 (21.9%)              | 145 (27.4%)              | <0.0001                |
| <b>Mean (StdDev)</b>      |                        |                          |                          |                        |
| Extent PD $\geq$ 4mm      | 7.05 (11.3)            | 8.12 (12.3) <sup>a</sup> | 9.66 (14.8) <sup>d</sup> | <0.0001                |
| Mean PD                   | 1.89 (0.56)            | 1.94 (0.61)              | 2.03 (0.74) <sup>d</sup> | <0.0001                |
| Extent AL $\geq$ 3mm      | 21.7 (21.8)            | 27.6 (26.0) <sup>d</sup> | 34.3 (28.7) <sup>d</sup> | <0.0001                |
| Mean AL                   | 1.72 (0.96)            | 1.94 (1.15) <sup>d</sup> | 2.29 (1.43) <sup>d</sup> | <0.0001                |
| Extent BOP                | 25.2 (23.4)            | 25.1 (24.3)              | 27.7 (26.4) <sup>a</sup> | 0.07                   |
| Extent PQ $\geq$ 1        | 42.5 (38.3)            | 39.3 (37.7) <sup>a</sup> | 49.9 (39.3) <sup>d</sup> | <0.0001                |
| Number of Teeth           | 22.0 (6.99)            | 21.5 (7.26)              | 18.8 (8.09) <sup>d</sup> | <0.0001                |

<sup>a</sup> =  $p < 0.05$ , <sup>b</sup> =  $p < 0.01$ , <sup>c</sup> =  $p < 0.001$ , <sup>d</sup> =  $p < 0.0001$ ,

All superscripted p values are compared to reference group by Chi square or GLM

Table 5: Generalized Logits Models: Periodontal status (CDC/AAP Definition) by GOLD stages

|                                    | <b>GOLD I</b>           | <b>GOLD II/III/IV</b>   |
|------------------------------------|-------------------------|-------------------------|
| <b>Model 1 Crude</b>               |                         |                         |
| Healthy                            | Reference               | Reference               |
| Entry                              | 1.10 (0.92-1.31)        | <b>1.62 (1.31-2.00)</b> |
| Severe                             | <b>1.55 (1.26-1.91)</b> | <b>2.60 (2.05-3.31)</b> |
| <b>Model 2 Minimally Adjusted*</b> |                         |                         |
| Healthy                            | Reference               | Reference               |
| Entry                              | 0.99 (0.83-1.19)        | <b>1.42 (1.14-1.77)</b> |
| Severe                             | <b>1.46 (1.17-1.82)</b> | <b>2.17 (1.67-2.80)</b> |
| <b>Model 3 Fully Adjusted **</b>   |                         |                         |
| Healthy                            | Reference               | Reference               |
| Entry                              | 0.95 (0.79-1.14)        | 1.10 (0.87-1.39)        |
| Severe                             | 1.23 (0.97-1.55)        | <b>1.41 (1.07-1.87)</b> |

\*Model 2 is minimally adjusted for race/center (5-level), male, age (years)

\*\*Model 3 is fully adjusted for race/center (5-level), male, age (years), diabetes, hypertension, smoking (5-levels), smokeless tobacco, alcohol, income (3-level), education (3-level)

Table 6: Self reported physician diagnosis of bronchitis or emphysema according to GOLD stages .

|                   | <b>No Chronic<br/>Respiratory<br/>Symptoms &amp; No<br/>Lung Function<br/>Abnormality</b> | <b>GOLD Zero<br/>(Chronic<br/>Respiratory<br/>Symptoms &amp; No<br/>Lung Function<br/>Abnormality)</b> | <b>Restrictive<br/>Disease<br/>(FEV<sub>1</sub>/FVC≥0.7<br/>and FVC&lt;80%<br/>predicted)</b> | <b>GOLD I</b> | <b>GOLD II</b> | <b>GOLD III/IV</b> | <b>p-value<sup>a</sup></b> |
|-------------------|-------------------------------------------------------------------------------------------|--------------------------------------------------------------------------------------------------------|-----------------------------------------------------------------------------------------------|---------------|----------------|--------------------|----------------------------|
| Self Report (Yes) | 633 (6.5%)                                                                                | 65 (20.9%)                                                                                             | 64 (10.4%)                                                                                    | 143 (10.1%)   | 201 (17.5%)    | 89 (34.1%)         |                            |
| No                | 9083 (93.5%)                                                                              | 246 (79.1%)                                                                                            | 551 (89.6%)                                                                                   | 1269 (89.7%)  | 949 (82.5%)    | 172 (65.9%)        | <0.0001                    |

a) Chi square

1  
2  
3  
4  
5  
6  
7  
8  
9  
10  
11  
12  
13  
14  
15  
16  
17  
18  
19  
20  
21  
22  
23  
24  
25  
26  
27  
28  
29  
30  
31  
32  
33  
34  
35  
36  
37  
38  
39  
40  
41  
42  
43  
44  
45  
46  
47  
48  
49  
50  
51  
52  
53  
54  
55  
56  
57  
58  
59  
60

For peer review only

1  
2  
3  
4  
5  
6  
7  
8  
9  
10  
11  
12  
13  
14  
15  
16  
17  
18  
19  
20  
21  
22  
23  
24  
25  
26  
27  
28  
29  
30  
31  
32  
33  
34  
35  
36  
37  
38  
39  
40  
41  
42  
43  
44  
45  
46  
47  
48  
49  
50  
51  
52  
53  
54  
55  
56  
57  
58  
59  
60

# Participant Flow Diagram

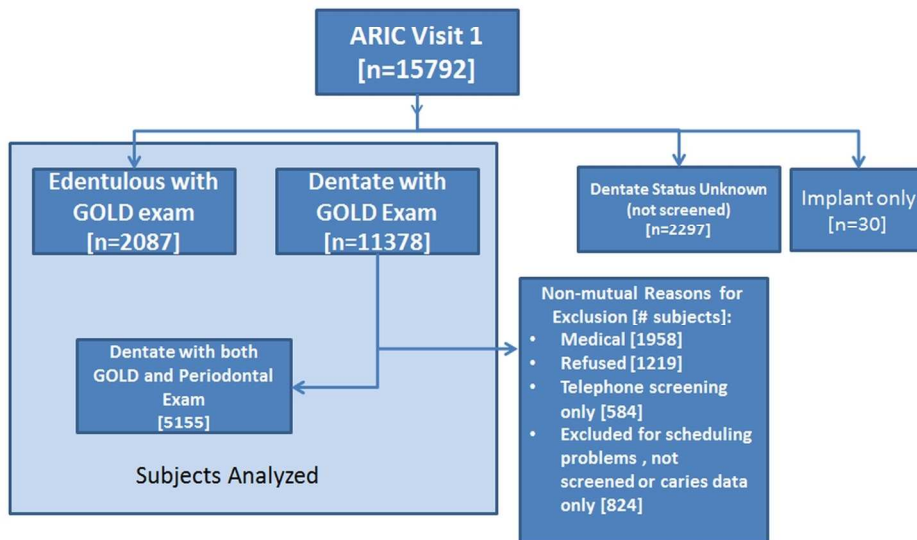

129x90mm (300 x 300 DPI)

view only

Word Count: 29342763

**OBSTRUCTIVE AIRWAYLUNG DISEASE AND EDENTULISM IN THE ATHEROSCLEROSIS  
RISK IN COMMUNITIES (ARIC) STUDY**

Running Title: COPD and Edentulism

**Keywords:** pulmonary disease, edentulism, chronic obstructive pulmonary disease, bronchitis

Steven Offenbacher, DDS<sup>1</sup>, James D Beck, PhD<sup>2</sup>, Silvana P Barros, DDS<sup>1</sup>, Robert Suruki ,ScD<sup>3</sup> and Zvi  
G Loewy, PhD<sup>4</sup>

<sup>1</sup>Department of Periodontology, School of Dentistry, University of North Carolina , Chapel Hill, NC  
27599

<sup>2</sup>Department of Dental Ecology, School of Dentistry, University of North Carolina, Chapel Hill, NC  
27599

<sup>3</sup>Worldwide Epidemiology, GlaxoSmithKline R&D, Research Triangle Park, NC 27709-3398

<sup>4</sup>Department of Pharmaceutical and Biomedical Sciences, Touro College of Pharmacy, New York, NY  
10027 and Department of Biochemistry & Molecular Biology, New York Medical College, Valhalla, NY,  
10595

\*Address correspondence to

Steve Offenbacher, DDS, PhD, MMSc

Department of Periodontology, UNC School of Dentistry

North Carolina Oral Health Institute

PO Box 14290

Durham, NC 27709

Phone: (919)425-3597 Fax: (919)425-3530

Email: [steve\\_offenbacher@dentistry.unc.edu](mailto:steve_offenbacher@dentistry.unc.edu)

## Abstract:

**Objectives:** We examined the potential association between prior COPD and edentulism, and whether the association varied by COPD severity using data from the Dental ARIC Study.

**Design:** Cross-sectional ~~Case-control~~

**Setting:** Community dwelling subjects from four US communities.

**Participants and Measurements:** Cases were identified as edentulous (without teeth) and subjects with one or more natural teeth were identified as dentate. COPD cases were defined by spirometry measurements that showed the ratio of forced expiratory volume (one second) to vital capacity to be less than 0.7. The severity of COPD cases was also scored using a modified Global Initiative for Chronic Obstructive Lung Disease classification criteria (GOLD scoring I-IV). Multiple-logistic regression was used to examine the association between COPD and edentulism, while adjusting for age, gender, center/race, ethnicity, education level, income, diabetes, hypertension, coronary heart disease and congestive heart failure, body mass index, smoking, smokeless tobacco use and alcohol consumption.

**Results:** 13,465 participants were included in this analysis (2,087 edentulous; 11,378 dentate). Approximately 28.3% of edentulous participants had prior COPD compared to 19.6% among dentate participants ( $p < 0.0001$ ). After adjustment for potential confounders, we observed a 1.3(1.08-1.62) and 2.5(1.68-3.63) fold increased risk of edentulism among GOLD II and GOLD III/IV COPD, respectively, as compared to the non-COPD/dentate referent. Given the short period of time between the measurements of COPD (Visit2) and dentate status (Visit4) relative to the natural history of both diseases, neither temporality nor insight as to the directionality of the association can be ascertained.

**Conclusion:** We found a statistically significant association between prior COPD and edentulism, with evidence of a positive incremental effect seen with increasing GOLD classification.

## INTRODUCTION



1  
2  
3  
4  
5  
6  
7  
8  
9  
10  
11  
12  
13  
14  
15  
16  
17  
18  
19  
20  
21  
22  
23  
24  
25  
26  
27  
28  
29  
30  
31  
32  
33  
34  
35  
36  
37  
38  
39  
40  
41  
42  
43  
44  
45  
46  
47  
48  
49  
50  
51  
52  
53  
54  
55  
56  
57  
58  
59  
60

Chronic obstructive pulmonary disease (COPD) is currently the fifth leading cause of death world-wide, and is expected to rise to fourth place in 2030.<sup>1</sup> Although COPD has a heterogeneous clinical presentation primarily characterized by airflow limitation, generally associated with an abnormal inflammatory response of the lungs<sup>2</sup>, it is also often associated with a significant systemic inflammatory response<sup>3</sup> which has been correlated with adverse clinical effects<sup>3,4</sup>.

Over the past decade there has been an increased interest in the link between respiratory diseases and oral infection. Higher levels of tooth-associated microorganisms (plaque) and periodontal disease have been associated with COPD<sup>5,6,7</sup>. Recently, in a very comprehensive oral microbiology study, high levels of diverse microbes- including several implicated in COPD and denture stomatitis- were identified on previously worn dentures<sup>8</sup>. Thus both the teeth and the dentures are non-desquamating oral surfaces that allow the oral biofilm to emerge eliciting periodontal disease or denture stomatitis, respectively. This raises the question as to whether denture-associated microbes may contribute to COPD in a manner analogous to that similar to periodontal organisms. Because oral infections and denture-based sources of sepsis are both treatable and preventable, the potential association of high microbial burden of oral origin to COPD may represent modifiable risk factors that may potentially improve respiratory-related morbidity. It has been suggested by Garcia and colleagues<sup>7</sup> that the observed association between oral health and COPD may be due to aspiration of oral pathogens, or a common underlying host susceptibility trait that places individuals at risk for both conditions such as an exaggerated inflammatory response that is triggered by oral microbes.

Although numerous studies have examined the association between oral health and respiratory diseases in dentate individuals, the published literature are scant with respect to studies that have examined the association between edentulism and COPD status/severity. We undertook the current study to examine the potential association between COPD and edentulism using data from the Atherosclerosis Risk in

1  
2  
3 Communities (ARIC) Study. We hypothesized that edentulism would be associated with a diagnosis of  
4 COPD and display a higher prevalence with more spirometry categories of COPD. These data include not  
5  
6 only dentate status and full-mouth periodontal examination measurements, but also includes results from  
7  
8 direct pulmonary function tests and symptomology assessments that enabled us to classify the levels of  
9  
10 COPD present.  
11  
12  
13

## 14 15 16 17 18 **METHODS** 19

20 We sought to test the hypothesis that the prevalence of edentulism was greater among individuals with a  
21 reported history of lung disease, (i.e. COPD) and that the association with edentulism varied by COPD  
22 severity as determined by a modified Global Initiative for Chronic Obstructive Lung disease (GOLD)  
23 criteria. Our second hypothesis was that among dentate subjects there was a difference in the prevalence  
24 of periodontal disease according to the severity of COPD as measured by GOLD criteria.  
25  
26  
27  
28  
29  
30

### 31 **Study Population and Study Design** 32

33 The entire cohort from the ARIC study was 15,792 and the available dental cohort Dental Atherosclerosis  
34 Risk in Communities (D-ARIC) data were used to study participants with both a periodontal examination  
35 and completed spirometry data. The cohort selection process and reasons for exclusion appear in Figure 1.  
36 Descriptions of the cohort and the periodontal examination procedure have been described previously<sup>9</sup>.  
37  
38 Eligible participants were all aged 45-64 at study entry (i.e., Visit 1) and had spirometry measurements at  
39 Visit 2 (3 years later) and periodontal examinations at D-ARIC Visit 4 (6 years from visit 2).  
40  
41  
42  
43  
44  
45  
46  
47  
48

### 49 **Case Definitions** 50

51 Edentulism case definitions were defined as study participants without any natural teeth or implants.  
52  
53 Participants with one or more natural teeth (comprising 11,378 subjects) were selected as the dentate  
54  
55 subjects. The absence, presence or severity of periodontal disease among dentate subjects was determined  
56  
57  
58  
59  
60

using the joint American Association of Periodontology/Center for Disease Control (AAP/CDC) consensus definitions of Health, Early and Advanced disease.<sup>10</sup>

This investigation represents the first report that uses actual pulmonary function data to assess lung function as an exposure related to edentulism or periodontal disease. The measured exposure of pulmonary function was classified both as a dichotomous (e.g., COPD vs. no COPD) and ordinal categorical variable (e.g., no lung disease, ~~restrictive~~restricted disease, COPD GOLD Stage I, Stage II, Stage III, and Stage IV), using the following criteria.

#### Airway obstruction

#### Lung Obstruction

Dichotomous variable (COPD/no COPD)—Prior ~~airway~~lung obstruction (or COPD) was defined based on spirometry measurements collected during Visit 2. Participants with a ratio of forced expiratory volume in one second (FEV<sub>1</sub>) and forced vital capacity (FVC) less than 0.7 were determined to have ~~airway~~lung obstruction consistent with COPD.

Ordinal categorical variable (COPD GOLD Stage)—Severity of COPD was also examined in this study among COPD participants using a modification of the spirometry-based criteria for severity outlined in the GOLD guidelines.<sup>11,12</sup>

| <b>GOLD Stage</b>                 | <b>Spirometry Criteria</b>                                                                            |
|-----------------------------------|-------------------------------------------------------------------------------------------------------|
| No lung disease                   | FEV <sub>1</sub> /FVC ≥ 0.7 and FEV <sub>1</sub> ≥ 80% predicted                                      |
| <del>Restrictive</del> Restricted | FEV <sub>1</sub> /FVC ≥ 0.7 and FVC < 80% predicted                                                   |
| Stage 0                           | Presence of respiratory symptoms in the absence of any lung function abnormality; and no lung disease |
| Stage I                           | FEV <sub>1</sub> /FVC < 0.7 and FEV <sub>1</sub> ≥ 80% predicted                                      |
| Stage II                          | FEV <sub>1</sub> /FVC < 0.7 and 50% ≤ FEV <sub>1</sub> < 80% predicted                                |
| Stage III                         | FEV <sub>1</sub> /FVC < 0.7 and 30% ≤ FEV <sub>1</sub> < 50% predicted                                |

|          |                                                               |
|----------|---------------------------------------------------------------|
| Stage IV | FEV <sub>1</sub> /FVC<0.7 and FEV <sub>1</sub> <30% predicted |
|----------|---------------------------------------------------------------|

### Variables of Interest

Smoking data (both for cigarettes and cigars) collected during Visit 4 were used to adjust for the confounding effect of smoking on the relationship between airwaylung obstruction (COPD) and being edentulous. Smoking was treated as a five-level categorical variable, as described in detail previously<sup>7</sup>.

Cardiovascular disease (CVD) comorbidities that may be associated with both history of airwaylung obstruction and being edentulous were also examined using data from Visit 4. Other potential confounders examined included race and examination center, ethnicity, education level, income, frequency of dental visits, diabetes, body mass index, alcohol use, and medication utilization. These data were extracted from Visit 4.

### Data Analysis

Multivariate logistic regression was used to examine the association between COPD and edentulous status. This was followed by a logistic regression analysis of the dentate subjects comparing the COPD prevalence and severity of dentate patients without periodontal disease to that of dentate patients with periodontal disease. The exposure variable, which is airwaylung obstruction, was examined as both a dichotomous variable (e.g., positive prior COPD vs. no COPD) and by logistic models using nominal variables (e.g., no lung disease, restrictiverestricted disease, GOLD 0, Stage I, Stage II, Stage III, and Stage IV) based upon spirometry data collected as part of the ARIC examination. For the no COPD or GOLD reference group we included: subjects with and without chronic respiratory symptoms with no lung function abnormality, and subjects with GOLD 0 and restrictiverestricted disease. Multiple regression models were used to control for confounding. When adjusting for potential confounding variables we included in certain models variables that are known to modify either periodontal disease status or COPD, including Body mass index and smokeless tobacco. We developed minimally and fully-

1  
2  
3 adjusted logistical models incorporating significant confounders and effect modifiers to compute odds  
4 ratios (OR) and 95% confidence intervals (CI). SAS Version 9.2 (Cary, NC). We also included traditional  
5 risk factors for edentulism, periodontal disease and COPD- such as age, even if not statistically significant  
6 in this cohort. A p-value of <0.05 was considered statistically significant for this study.  
7  
8  
9  
10

### 11 12 13 **Sample Size and Power Calculations**

14  
15 We knew *a priori* that the ARIC cohort who had spirometry data from Visit 2 included 2,087 edentulous  
16 subjects, as determined by questionnaire data at Visit 4. We also had 11,378 dentate subjects with  
17 spirometry data at Visit 2, of which 5,155 subjects had a full-mouth periodontal exam completed. Thus, if  
18 approximately 9% of the 13,465 subjects (2,087 edentulous and 11,378 dentate) were determined to have  
19 COPD, we estimated that we had >99% power to detect a significant difference of 1% at p=0.05 in the  
20 prevalence of COPD when comparing edentulous vs. dentate subjects.  
21  
22  
23  
24  
25  
26  
27  
28  
29  
30

### 31 **RESULTS**

32  
33 ARIC subject participation was based upon the inception cohort of 15,792 subjects. The Visit 4  
34 screenings were broadly divided into 11,378 dentate and 2,087 edentulous subjects who also had  
35 spirometry data. These subjects are used for analyses in Tables 1-6 on the relationship between dentate  
36 status and COPD. Subjects were excluded (n=2,327) from the original inception participants for  
37 incomplete data, dental implants only, and missing Visit 4 screening. Table 7 is based upon the 8,274  
38 subjects eligible for the oral exam, of which 6967 (84.1%) were actually examined. Of those examined,  
39 the periodontal portion of the exam was not completed on 174 subjects, resulting in 6,793 subjects with  
40 full periodontal data.  
41  
42  
43  
44  
45  
46  
47  
48  
49  
50

51  
52  
53 The distribution of study subjects according to dentate status and GOLD classification is shown in Table  
54 1. Among the edentulous subjects (2087), there were 591 or 28.3% with COPD (Gold Stages I-IV). With  
55 the exception of GOLD I where the prevalence of edentulism was 14.7 percent, the prevalence of  
56  
57  
58  
59  
60

1  
2  
3 edentulous individuals increased from 16.4 percent for GOLD 0 to 35.6% for GOLD III/IV. . The crude  
4  
5 odds ratio (not shown in Table 1) for edentulism being associated with prior COPD vs no COPD was 1.62  
6  
7 (95% CI, 1.46-1.80). Approximately 13 percent of individuals with no chronic respiratory symptoms and  
8  
9 no lung function abnormality (i.e. no lung disease) were edentulous. There were 2232 subjects with a  
10  
11 prior COPD (19.6%) among 11,378 dentate subjects.

12  
13  
14 Table 2 presents the prevalence of various subject characteristics according to GOLD classification. In  
15  
16 this table, the GOLD reference group for statistical testing combines the following three categories of  
17  
18 subjects: no lung disease, GOLD 0, and subjects with chronic respiratory symptoms but no lung function  
19  
20 abnormality. The general patterns reflected in Table 2 show that compared to the reference group those  
21  
22 subjects in the GOLD III-IV category were much more likely to be edentulous, to smoke, to use  
23  
24 smokeless tobacco, to be African American or North Carolina Caucasians, male, and somewhat more  
25  
26 likely to have lower levels of income and education, be older and more likely to have chronic heart failure  
27  
28 and heart disease.  
29  
30  
31  
32

33  
34 Table 3 presents multivariate logistic models for the relationship between edentulous /dentate status and  
35  
36 GOLD stages using the GOLD reference group described above. In an unadjusted model individuals with  
37  
38 GOLD II and GOLD III/IV scores were at significantly higher odds for edentulism that increased with  
39  
40 increasing GOLD stage severity (OR=2.06; 95% CI 1.79-2.38 and OR=3.38; 95% CI 2.61-4.39,  
41  
42 respectively). Minimally adjusted models (race/center, sex and age) showed similar significant effects for  
43  
44 GOLD II and GOLD III/IV with little attenuation. The increased risk of being edentulous for GOLD II  
45  
46 and GOLD III/IV categories remain significant, but have slightly lower odds ratios. However, the fully  
47  
48 adjusted model showed more attenuation with the odds for being edentulous being 1.3 (1.08-1.62) and 2.5  
49  
50 (1.68-3.63) times greater for GOLD II disease and the most severe category GOLD III/IV, respectively.  
51  
52  
53  
54

55  
56 Table 4 shows the association between periodontal status and GOLD classifications for the dentate  
57  
58 subjects. Because of small cell sizes in the GOLD III and IV groups, we combined them with GOLD II.  
59  
60

1  
2  
3 Using the CDC/AAP classification of periodontal disease, which is based upon clusters of clinical signs,  
4 there is a significant positive association between higher GOLD stage and severe periodontal disease  
5 (p<0.0001). Subjects with GOLD I or GOLD II-IV were more likely to have severe periodontitis than the  
6 reference group. With respect to the individual periodontal variables measured as means or extent scores,  
7 individuals with a GOLD classification of I were more likely to have a greater extent of periodontal  
8 pocket depths of 4mm or more, greater extent of attachment loss of 3mm. or more, a higher mean  
9 attachment loss and a greater extent of plaque in their mouths than the reference group. Those with  
10 GOLD scores of II-IV were significantly higher on all periodontal measures and had fewer teeth  
11 compared to the reference group.  
12  
13  
14  
15  
16  
17  
18  
19  
20  
21  
22  
23  
24

25 Logistic models for the association between GOLD status and periodontal status using the AAP/CDC  
26 definitions appear in Table 5. As in Table 4, small cell size resulted in grouping the more severe GOLD  
27 stages together as GOLD II/III/IV. In general, the odds ratios for severe periodontal disease increased  
28 with more severe GOLD stage in the crude, minimally adjusted and fully adjusted models. There is also  
29 an increase in odds as the severity of periodontal disease increases for the two GOLD categories shown  
30 using the periodontally healthy group as the reference group within each GOLD category. Although  
31 adjusting for relevant confounders generally decreased the odds, there was still a statistically significant  
32 association between higher GOLD stage and severe periodontal disease in the fully adjusted model  
33 (OR=1.41; 95% CI 1.07-1.87).  
34  
35  
36  
37  
38  
39  
40  
41  
42  
43  
44  
45  
46

47 The relationship between spirometry based GOLD classification and self-reported physician-based  
48 diagnosis of bronchitis or emphysema is shown in Table 6. Participants classified as GOLD III/IV were  
49 significantly more likely to have self-reported bronchitis or emphysema. There is a trend for a positive  
50 association except for the GOLD zero category. Interestingly, 65.9% of subjects with GOLD III/IV  
51 report no diagnosis of COPD suggesting that self-report of bronchitis or emphysema is not a strong  
52 predictor of GOLD status. In fact, of all subjects reporting a positive diagnosis of bronchitis or  
53  
54  
55  
56  
57  
58  
59  
60

1  
2  
3 emphysema 53% demonstrated no evidence of chronic respiratory symptoms and no lung function  
4  
5 abnormality.  
6  
7  
8  
9  
10

## 14 DISCUSSION

16 We found a statistically significant association between prior COPD and edentulism, with evidence of an  
17  
18 increasing prevalence of edentulism with increasing GOLD classification. Although there was some  
19  
20 reduction in the magnitude of effect in the adjusted models, the association between dentate status and  
21  
22 GOLD classification remained statistically significant even in the fully adjusted model, with a 1.3 fold  
23  
24 increased odds of being edentulous in the GOLD II category and a 2.5 fold increased odds of being  
25  
26 edentulous in the most severe GOLD III/IV category in the fully adjusted regression model. This  
27  
28 represents the first report of an association between edentulism and COPD in a population with GOLD  
29  
30 measurements.  
31  
32  
33  
34  
35

36 In the subgroup of dentate subjects, there was a significant association between the GOLD II - IV group  
37  
38 vs. the GOLD reference group and prevalent periodontal disease with a statistically significant increase  
39  
40 in the odds of entry level and severe periodontal disease in the crude and minimally adjusted models. In  
41  
42 the fully adjusted model, only the association between GOLD stage II/III/IV and severe periodontal  
43  
44 disease [OR 1.41 (1.07-1.87)] remained statistically significant. This is the first population report to  
45  
46 include both full-mouth periodontal examination data as well as Spirometry assessments, thereby  
47  
48 providing direct confirmation of the association between severe periodontal disease and COPD, as well as  
49  
50 a dose-response relationship between these conditions.  
51  
52  
53  
54

55 While there is no previous published information available about the association between edentulism  
56  
57 status and COPD, there is evidence in the literature of an association between periodontal disease and  
58  
59  
60



1  
2  
3 COPD, consistent with the findings of the current study<sup>5,6,7</sup>. The results of this investigation were based  
4 upon standardized pulmonary function tests and suggest that studies that are based upon self-reported  
5 diagnoses can potentially result in statistically significant misclassification error. Our data shown in Table  
6 suggest that of the 12,297 subjects reporting no diagnosis, 2,390 subjects or 19.4% were classified as  
7 GOLD I-IV. Among those 433 subjects with GOLD I-IV the positive predictive rate was only 15.3%.  
8 These findings suggest that an important strength of the current study was the classification of disease  
9 based on an objective biological measure (e.g., spirometry) rather than a self-reported measure.  
10  
11  
12  
13  
14  
15  
16  
17  
18  
19

20 Additional strengths of the current study include the large sample size, the inclusion of African  
21 Americans providing some racial diversity of the sample, the use of a full-mouth examination protocol  
22 and the collection of information about key confounding variables, including but not limited to: tobacco  
23 use, hypertension, diabetes, and income. Furthermore, the outcomes of interest, edentulism and  
24 periodontal disease, were evaluated using a comprehensive oral examination at Visit 4.  
25  
26  
27  
28  
29  
30  
31  
32

33 The current study must also be considered in light of certain limitations. First, the design of the current  
34 study does not allow us to determine the directionality or temporality of any association found. It has been  
35 reported previously that the dental ARIC sub-sample is healthier than the greater ARIC sample and that  
36 the edentulous subjects within the ARIC dataset have overall poorer health,<sup>9</sup> as compared to the ARIC  
37 dental sample. Thus, it is possible that the observed relationship between both edentulism and periodontal  
38 disease with prior COPD may be due in part to shared risk factors. There is also the potential bias due to  
39 differential loss to follow-up prior to Visit 4. The current study included only those subjects with dental  
40 history information at Visit 4. Finally, it is possible that participants with COPD may have been more  
41 likely to be lost to follow-up (compared to participants without COPD) or that participants with more  
42 severe COPD may have had a lower probability of surviving to Visit 4 than participants with mild COPD  
43 or normal lung function. There are no data in this report to mechanistically link edentulism with  
44 increased risk for COPD. Previous studies of periodontal disease associations with COPD have discussed  
45  
46  
47  
48  
49  
50  
51  
52  
53  
54  
55  
56  
57  
58  
59  
60

1  
2  
3 the potential role of periodontal infection serving as a chronic repository of pathogenic oral organisms  
4 that could be aspirated into the airway to challenge the lungs<sup>6</sup>. Periodontal infections are also associated  
5 with increases in systemic markers of inflammation including biomarkers such as C-reactive protein  
6 (CRP)<sup>13</sup>. By analogy, edentulism is commonly associated with denture infections (denture mucositis)  
7 which induce mucosal inflammation and unclean dentures can also pose as a chronic reservoir of oral  
8 pathogens. However, the potential role of denture-based infection as a potential risk factor for COPD  
9 remains to be elucidated.  
10  
11  
12  
13  
14  
15  
16  
17  
18  
19  
20  
21  
22

## 23 CONCLUSIONS

24  
25  
26  
27 Edentulism was associated with prior COPD, with an incremental effect observed with increasing GOLD  
28 classification. Additionally, among dentate individuals, severe periodontal disease was associated with  
29 GOLD classification. This is one of the first analyses of COPD and dentate status, and expands upon the  
30 available literature regarding periodontal disease and COPD. Further research is warranted to explore the  
31 relationship of edentulism and periodontal disease with COPD.  
32  
33  
34  
35  
36  
37  
38  
39

## 40 Conflict of Interest

41  
42 There are no potential conflicts of interest that exist with any companies/organizations whose products or  
43 services may be discussed in this article.  
44  
45

## 46 Source of Funding

47  
48 This work was supported by a grant from GlaxoSmithKline and we declare that the sponsor had no role in  
49 the study design, collection, analysis and interpretation of data; in the writing of the manuscript; and in  
50 the decision to submit the manuscript for publication.  
51  
52

## 53 Responsibility for Data

54  
55 This is to verify that we have full access to all the data in this study and take full responsibility for the  
56 integrity of the data and accuracy of the data analysis, including and especially any adverse effects.  
57  
58  
59  
60

**Abbreviations:**

AAP/CDC – American Association of Periodontology/Center for Disease Control

ARIC – Atherosclerosis Risk in Communities

CHF – Congestive Heart Failure

CI – Confidence Intervals

COPD – Chronic Obstructive Pulmonary Disease

CVD – Cardiovascular Disease

D-ARIC – Dental Atherosclerosis Risk in Communities

FEV – Forced Expiratory Volume

FVC – Forced Vital Capacity

GOLD – Global Initiative for Chronic Obstructive Lung Disease

MAL – Mean Attachment Loss

NHANES – National Health and Nutrition Examination Survey

OR – Odds Ratio

SES – Social Economic Status

WHO – World Health Organization

## REFERENCES

1. Wouters EFM. Economic analysis of the confronting COPD survey: an overview of results. *Respiratory Medicine* 2003;**97**(C): S3-S14.
2. Mathers CD, Loncar D. Projections of global mortality and burden of disease from 2002 to 2030. *PLoS Med*. 2006;**3**(11):e442.
3. Rabe KF, Hurd S, Anzueto A, Barnes PJ, Buist SA, Calverley P et al. Global strategy for the diagnosis, management, and prevention of chronic obstructive pulmonary disease: GOLD executive summary. *Am J Respir Crit Care Med*. 2007;**176**(6):532-55.
4. van Eeden, SF, Sin DD. Chronic Obstructive Pulmonary Disease: A Chronic Systemic Inflammatory Disease. *Respiration* 2008;**75**(2):224-38.
5. Scannapieco FA, Ho AW. Potential associations between chronic respiratory disease and periodontal disease: analysis of National Health and Nutrition Examination Survey III. *J Periodontol* 2001;**72**(1):50-6.
6. Scannapieco FA, Papandonatos GD, Dunford RG. Associations between oral conditions and respiratory disease in a national sample survey population. *Ann Periodontol* 1998;**3**(1):251-6.
7. Garcia RI, Nunn ME, Vokonas PS. Epidemiologic associations between periodontal disease and chronic obstructive pulmonary disease. *Ann Periodontol* 2001;**6**(1):71-7.
8. Glass RT, Conrad RS, Bullard JW, Goodson LB, Mehta N, Lech SJ et al. Evaluation of microbial flora found in previously worn prostheses from the Northeast and Southwest regions of United States. *Journal of Prosthetic Dentistry* 2010;**103**(6):384-9.
9. Elter JR, Offenbacher S, Toole JF, Beck JD. Relationship of periodontal disease and edentulism to stroke/TIA. *J Dent Res* 2003;**82**(12):998-1001.
10. Page RC, Eke PI. Case definitions for use in population-based surveillance of periodontitis. *J Periodontol* 2007;**78**(7 Suppl): 1387-99.
11. Pauwels RA, Buist AS, Calverley PMA, Jenkins CR, Hurd SS. Global Strategy for the Diagnosis, Management, and Prevention of Chronic Obstructive Pulmonary Disease. NHLBI/WHO Global Initiative for Chronic Obstructive Lung Disease (GOLD) Workshop Summary. *American Journal of Respiratory and Critical Care Medicine* 2001;**163**(5): 1256-76.
12. Mannino DM, Doherty DE, Buist SA. Global Initiative on Obstructive Lung Disease (GOLD) classification of lung disease and mortality: findings from the Atherosclerosis Risk in Communities (ARIC) study. *Respiratory Med* 2006;**100**(1):115-22.
13. Slade GD, Ghezzi EM, Heiss G, Beck JD, Riche E, Offenbacher S. Relationship between Periodontal Disease and C-Reactive Protein among Adults in the Atherosclerosis Risk in Communities Study. *Arch Intern Med*. 2003;**163**(10):1172-9.
